# Supplementary material for: Potential Anticancer Agents against Melanoma Cells Based on an As-Synthesized Thiosemicarbazide Derivative
Source: MDPI journal article supplement (doi:10.3390/biom12020151), 2022-01-18

# Supplementary material

## Lipophilicity analysis:

In the case of HPLC the chromatographic lipophilicity parameter  $\log k_w$  were obtained by the extrapolation of the retention parameter  $\log k$  to pure water, according to Equation:

$$\log k = \log k_w - S \cdot \phi \quad (1)$$

where  $\log k_w$  is the value of the retention factor of a substance in pure water,  $S$  is the slope of the regression curve, and  $\phi$  is the concentration of the organic modifier.

The values of  $\log k$  were calculated based on the raw HPLC data using the formula:

$$\log k = \log \left( \frac{t_R - t_0}{t_0} \right) \quad (2)$$

where  $t_R$  is the retention time and  $t_0$  is the dead retention time (determined for uracil).

Whereas, in the case of TLC the retention parameter ( $R_M$ ) is calculated using the formula:

$$R_M = \log \left( \frac{1 - R_f}{R_f} \right) \quad (3)$$

where  $R_f$  is the retardation factor.

**Table S1.** The retention time  $t_R$  and  $\log k$  coefficients of the tested compounds for the respective concentrations of methanol in water (v/v)

| name        | RP-HPLC |       |       |      |      |      |          |        |        |        |         |         |
|-------------|---------|-------|-------|------|------|------|----------|--------|--------|--------|---------|---------|
|             | $t_R$   |       |       |      |      |      | $\log k$ |        |        |        |         |         |
|             | 55      | 60    | 65    | 70   | 75   | 80   | 55       | 60     | 65     | 70     | 75      | 80      |
| <b>PK1</b>  | 14.86   | 6.32  | 5.54  | 3.94 | 3.08 | 2.54 | 0.8183   | 0.3504 | 0.2685 | 0.0176 | -0.2248 | -0.5097 |
| <b>PK2</b>  | 39.71   | 19.15 | 10.41 | 6.23 | 4.21 | 2.79 | 1.2847   | 0.9455 | 0.6401 | 0.3479 | 0.0724  | -0.3584 |
| <b>PK3</b>  | 10.72   | 7.48  | 5.47  | 4.2  | 3.41 | 2.87 | 0.6502   | 0.4527 | 0.2599 | 0.0705 | -0.1132 | -0.3193 |
| <b>PK5</b>  | 16.53   | 9.41  | 5.90  | 4.08 | 3.13 | 2.51 | 0.8712   | 0.5827 | 0.3099 | 0.0469 | -0.2064 | -0.5319 |
| <b>PK6</b>  | 31.20   | 16.51 | 9.47  | 5.29 | 4.19 | 3.21 | 1.1737   | 0.8731 | 0.5889 | 0.2408 | 0.0686  | -0.1839 |
| <b>PK7</b>  | 34.38   | 24.38 | 12.41 | 6.90 | 4.42 | 3.13 | 1.2186   | 1.0608 | 0.7321 | 0.4108 | 0.1106  | -0.2123 |
| <b>PK9</b>  | 36.90   | 21.67 | 9.41  | 5.71 | 3.97 | 3.01 | 1.2511   | 1.0049 | 0.5855 | 0.2919 | 0.0241  | -0.2584 |
| <b>PK11</b> | 24.03   | 10.51 | 7.54  | 4.92 | 3.58 | 2.89 | 1.0515   | 0.6424 | 0.4604 | 0.1901 | -0.0681 | -0.3384 |
| <b>PK12</b> | 27.89   | 18.37 | 9.60  | 5.68 | 3.85 | 2.89 | 1.1215   | 0.9253 | 0.5964 | 0.2885 | -0.0023 | -0.3101 |

**Table S2.**  $R_f$  and  $R_M$  parameters values of the tested compounds for the respective concentrations of methanol in water (v / v)

| name        | RP-TPLC |      |      |      |      |      |      |        |        |        |         |         |         |         |
|-------------|---------|------|------|------|------|------|------|--------|--------|--------|---------|---------|---------|---------|
|             | $R_f$   |      |      |      |      |      |      | $R_M$  |        |        |         |         |         |         |
|             | 65      | 70   | 75   | 80   | 85   | 90   | 95   | 65     | 70     | 75     | 80      | 85      | 90      | 95      |
| <b>PK1</b>  | 0.19    | 0.28 | 0.35 | 0.45 | 0.52 | 0.60 | 0.70 | 0.6297 | 0.4102 | 0.2688 | 0.0872  | -0.0348 | -0.1761 | -0.3679 |
| <b>PK2</b>  | 0.15    | 0.23 | 0.32 | 0.44 | 0.53 | 0.64 | 0.71 | 0.7533 | 0.5248 | 0.3274 | 0.1047  | -0.0522 | -0.2499 | -0.3889 |
| <b>PK3</b>  | 0.24    | 0.25 | 0.38 | 0.48 | 0.55 | 0.61 | 0.68 | 0.5006 | 0.4771 | 0.2126 | 0.0348  | -0.0872 | -0.1943 | -0.3274 |
| <b>PK5</b>  | 0.21    | 0.32 | 0.39 | 0.51 | 0.59 | 0.71 | 0.73 | 0.5754 | 0.3274 | 0.1943 | -0.0174 | -0.1581 | -0.3889 | -0.4319 |
| <b>PK6</b>  | 0.18    | 0.27 | 0.28 | 0.45 | 0.55 | 0.65 | 0.65 | 0.6585 | 0.4319 | 0.4102 | 0.0872  | -0.0872 | -0.2688 | -0.2689 |
| <b>PK7</b>  | 0.10    | 0.15 | 0.22 | 0.37 | 0.47 | 0.61 | 0.68 | 0.9542 | 0.7533 | 0.5497 | 0.2311  | 0.0522  | -0.1943 | -0.3274 |
| <b>PK9</b>  | 0.18    | 0.27 | 0.33 | 0.47 | 0.57 | 0.70 | 0.74 | 0.6585 | 0.4319 | 0.3076 | 0.0522  | -0.1224 | -0.3679 | -0.4543 |
| <b>PK11</b> | 0.19    | 0.28 | 0.35 | 0.48 | 0.57 | 0.59 | 0.73 | 0.6297 | 0.4102 | 0.2688 | 0.0348  | -0.1224 | -0.1581 | -0.4319 |
| <b>PK12</b> | 0.11    | 0.20 | 0.28 | 0.40 | 0.52 | 0.63 | 0.69 | 0.9079 | 0.6021 | 0.4102 | 0.1761  | -0.0348 | -0.2311 | -0.3475 |

**Table S3.** Linear equation parameters for the RP-HPLC and RP-TLC systems.

| name        | RP-HPLC    |        |        |     |          |       |          | RP-TLC |        |     |         |        |
|-------------|------------|--------|--------|-----|----------|-------|----------|--------|--------|-----|---------|--------|
|             | $\log k_w$ | $-S$   | $r$    | $n$ | $F$      | $SD$  | $R_{MW}$ | $-S$   | $r$    | $n$ | $F$     | $SD$   |
| <b>PK1</b>  | 3.4437     | 4.9238 | 0.9871 | 6   | 151.45   | 0.084 | 2.6706   | 3.1923 | 0.9975 | 7   | 1001.77 | 0.0270 |
| <b>PK2</b>  | 4.7804     | 6.3581 | 0.9979 | 6   | 983.51   | 0.042 | 3.2058   | 3.8253 | 0.9977 | 7   | 1094.25 | 0.0306 |
| <b>PK3</b>  | 2.7667     | 3.8522 | 0.9999 | 6   | 28991.50 | 0.005 | 2.4459   | 2.9474 | 0.9881 | 7   | 205.81  | 0.0544 |
| <b>PK5</b>  | 3.8993     | 5.5119 | 0.9995 | 6   | 3666.90  | 0.019 | 2.7612   | 3.4335 | 0.9926 | 7   | 332.22  | 0.0498 |
| <b>PK6</b>  | 4.1439     | 5.4574 | 0.9963 | 6   | 537.65   | 0.049 | 2.8125   | 3.3436 | 0.9795 | 7   | 117.92  | 0.0815 |
| <b>PK7</b>  | 4.5363     | 5.9005 | 0.9963 | 6   | 542.17   | 0.053 | 3.8527   | 4.4553 | 0.9966 | 7   | 734.09  | 0.0435 |
| <b>PK9</b>  | 4.6425     | 6.1619 | 0.9975 | 6   | 787.41   | 0.046 | 3.1398   | 3.8345 | 0.9959 | 7   | 599.05  | 0.0414 |
| <b>PK11</b> | 3.9300     | 5.3438 | 0.9958 | 6   | 478.75   | 0.051 | 2.7832   | 3.3663 | 0.9908 | 7   | 269.45  | 0.0542 |
| <b>PK12</b> | 4.3897     | 5.8565 | 0.9983 | 6   | 1184.60  | 0.035 | 3.5706   | 4.1984 | 0.9945 | 7   | 455.64  | 0.0520 |

**Table S4.** logP values calculated using computational methods.

| name        | $mi\log P$ | $c\log P$ | $ACD/\log P$ | $\log P_{cons}$ | $\log P_{ChemAxon}$ |
|-------------|------------|-----------|--------------|-----------------|---------------------|
| <b>PK1</b>  | 3.51       | 2.9       | 3.76+/- 0.67 | 4.05            | 4.13                |
| <b>PK2</b>  | 3.85       | 3.27      | 4.19+/- 0.66 | 4.53            | 4.65                |
| <b>PK3</b>  | 3.35       | 1.87      | 4.26+/- 0.65 | 2.18            | 1.51                |
| <b>PK5</b>  | 3.56       | 2.9       | 4.25+/- 0.67 | 2.61            | 1.70                |
| <b>PK6</b>  | 4.43       | 3.23      | 4.74+/- 0.67 | 3.55            | 2.69                |
| <b>PK7</b>  | 4.48       | 3.23      | 5.23+/- 0.67 | 3.40            | 2.55                |
| <b>PK9</b>  | 4.55       | 3.99      | 5.03+/- 0.64 | 4.89            | 5.00                |
| <b>PK11</b> | 4.16       | 3.52      | 4.48+/- 0.67 | 4.67            | 4.79                |
| <b>PK12</b> | 4.20       | 3.52      | 4.97+/- 0.67 | 4.67            | 4.79                |

**Table S5.** Correlation matrix of the lipophilicity parameters experimentally determined and calculated using different computer programs.

|                   | $\log k_w$      | $-S_{HPLC}$     | $R_{MW}$        | $-S_{TLC}$ | $milogP$        | $cLogP$         | $ACD/\log P$ | $LogP_{cons}$   | $logP_{ChemAxon}$ |
|-------------------|-----------------|-----------------|-----------------|------------|-----------------|-----------------|--------------|-----------------|-------------------|
| $\log k_w$        | 1               |                 |                 |            |                 |                 |              |                 |                   |
| $-S_{HPLC}$       | <b>0.985827</b> | 1               |                 |            |                 |                 |              |                 |                   |
| $R_{MW}$          | <b>0.734769</b> | 0.691854        | 1               |            |                 |                 |              |                 |                   |
| $-S_{TLC}$        | <b>0.753878</b> | <b>0.725243</b> | <b>0.990428</b> | 1          |                 |                 |              |                 |                   |
| $milogP$          | <b>0.74034</b>  | 0.65753         | 0.634226        | 0.627778   | 1               |                 |              |                 |                   |
| $cLogP$           | <b>0.827746</b> | <b>0.841247</b> | 0.559446        | 0.606069   | <b>0.793463</b> | 1               |              |                 |                   |
| $ACD/\log P$      | 0.574755        | 0.467179        | 0.667558        | 0.645095   | <b>0.848456</b> | 0.499167        | 1            |                 |                   |
| $logP_{cons}$     | 0.646951        | 0.652426        | 0.329624        | 0.328501   | 0.537054        | <b>0.799155</b> | 0.260655     | 1               |                   |
| $logP_{ChemAxon}$ | 0.539421        | 0.560854        | 0.275706        | 0.286048   | 0.401846        | <b>0.738152</b> | 0.116878     | <b>0.974213</b> | 1                 |

High values Pearson correlation coefficient ( $r > 0.97$ ) were obtained for the chromatographic parameters ( $\log k_w$ ,  $R_{MW}$ ,  $S$ ), which confirm that the analyzed 1-(2,4-dichlorophenoxy) thiosemicarbazide derivatives belong to the same congeneric compounds [31]. Relatively high values of the correlation coefficient ( $r > 0.82$ ) were obtained for the following relationships:  $milogP$  and  $ACD/\log P$  ( $r = 0.8485$ ),  $clogP$  and  $S_{HPLC}$  ( $r = 0.8413$ ),  $clogP$  and  $\log k_w$  ( $r = 0.8278$ ). The value of  $r > 0.72$  for the following correlations:  $\log k_w$  and  $R_{MW}$ ,  $\log k_w$  and  $S_{TLC}$ ,  $\log k_w$  and  $milogP$ ,  $S_{HPLC}$  and  $S_{TLC}$ ,  $clogP$  and  $milogP$ ,  $clogP$  and  $logP_{cons}$ ,  $clogP$  and  $logP_{ChemAxon}$ . The high value of Pearson correlation coefficient for the experimental and calculated lipophilicity parameters confirms the usefulness of the applied chromatographic methods (Table 5S).

The highest value of Pearson correlation coefficient ( $r > 0.90$ ) proves the highest correlation between the objects. In this case (Figure 2S), it can be concluded that the strongest correlation was obtained for clusters including the following parameter pairs:  $\log k_w$  and  $S_{HPLC}$ ,  $R_{MW}$  and  $S_{TLC}$ ,  $log_{cons}$ ,  $logP_{ChemAxon}$ . A good correlation ( $r = 0.85$ ) was also obtained for the following groups:  $milogP$  and  $ACDlogP$ ;  $clogP$  and  $\log k_w$  and  $S_{HPLC}$ .

**Figure S1.** The relationship of PC1 vs. PC2 for the parameters of lipophilicity (experimentally determined and calculated).

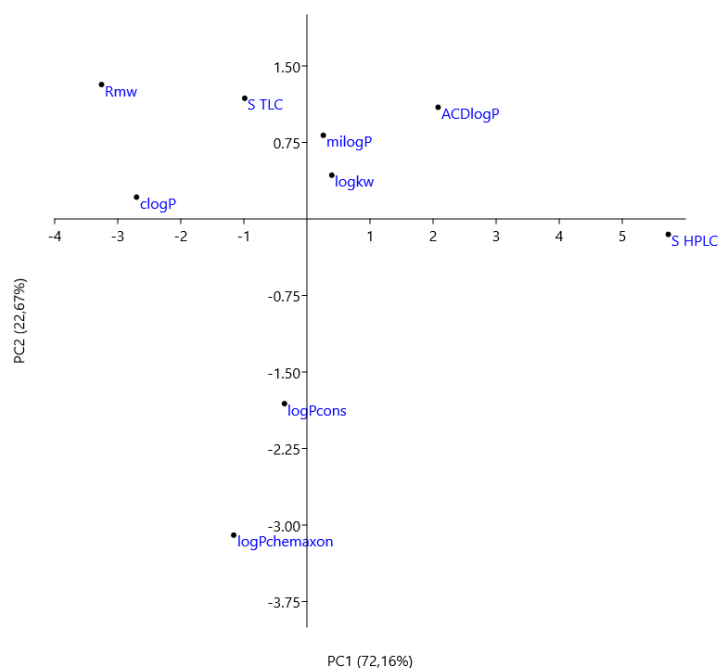

**Figure S2.** Dendrogram of experimentally and computationally obtained lipophilicity parameters (based on the Pearson correlation coefficient).

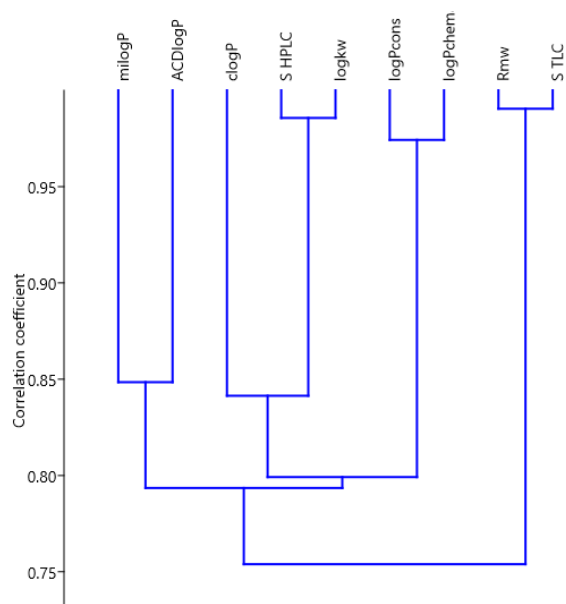

## X-ray analysis

### PK1

data\_shelx

```
_audit_creation_method      'SHELXL-2014/7'
_shelx_SHELXL_version_number  '2014/7'
_chemical_name_systematic    ?
_chemical_name_common        ?
_chemical_melting_point      ?
_chemical_formula_moiety      'C15 H12 Cl2 F N3 O2 S'
_chemical_formula_sum          'C15 H12 Cl2 F N3 O2 S'
_chemical_formula_weight      388.24
```

```
loop_
  _atom_type_symbol
  _atom_type_description
  _atom_type_scatter_dispersion_real
  _atom_type_scatter_dispersion_imag
  _atom_type_scatter_source
  'C' 'C' 0.0033 0.0016
  'International Tables Vol C Tables 4.2.6.8 and 6.1.1.4'
  'H' 'H' 0.0000 0.0000
  'International Tables Vol C Tables 4.2.6.8 and 6.1.1.4'
  'N' 'N' 0.0061 0.0033
  'International Tables Vol C Tables 4.2.6.8 and 6.1.1.4'
  'O' 'O' 0.0106 0.0060
  'International Tables Vol C Tables 4.2.6.8 and 6.1.1.4'
  'F' 'F' 0.0171 0.0103
  'International Tables Vol C Tables 4.2.6.8 and 6.1.1.4'
  'S' 'S' 0.1246 0.1234
  'International Tables Vol C Tables 4.2.6.8 and 6.1.1.4'
  'Cl' 'Cl' 0.1484 0.1585
  'International Tables Vol C Tables 4.2.6.8 and 6.1.1.4'
```

```
_space_group_crystal_system  triclinic
_space_group_IT_number        2
_space_group_name_H-M_alt     'P -1'
_space_group_name_Hall        '-P 1'
```

```
_shelx_space_group_comment
```

;

The symmetry employed for this shelxl refinement is uniquely defined by the following loop, which should always be used as a source of symmetry information in preference to the above space-group names. They are only intended as comments.

;

```
loop_
  _space_group_symop_operation_xyz
  'x, y, z'
  '-x, -y, -z'
```

```

_cell_length_a      7.3174(13)
_cell_length_b      8.2010(16)
_cell_length_c      15.629(2)
_cell_angle_alpha    82.251(14)
_cell_angle_beta     78.022(14)
_cell_angle_gamma    67.01(2)
_cell_volume         843.1(3)
_cell_formula_units_Z  2
_cell_measurement_temperature 296(2)
_cell_measurement_reflns_used 1110
_cell_measurement_theta_min 2.6770
_cell_measurement_theta_max 26.5420

_exptl_crystal_description plate
_exptl_crystal_colour colourless
_exptl_crystal_density_meas ?
_exptl_crystal_density_method ?
_exptl_crystal_density_diffn 1.529
_exptl_crystal_F_000 396
_exptl_transmission_factor_min ?
_exptl_transmission_factor_max ?
_exptl_crystal_size_max 0.6
_exptl_crystal_size_mid 0.2
_exptl_crystal_size_min 0.1
_exptl_absorpt_coefficient_mu 0.532
_shelx_estimated_absorpt_T_min ?
_shelx_estimated_absorpt_T_max ?
_exptl_absorpt_correction_T_min 0.78247
_exptl_absorpt_correction_T_max 1.00000
_exptl_absorpt_correction_type 'multi-scan'
_exptl_absorpt_process_details
;
CrysAlisPro, Agilent Technologies,
Version 1.171.37.35h (release 09-02-2015 CrysAlis171 .NET)
(compiled Feb 9 2015,16:26:32)
Empirical absorption correction using spherical harmonics,
implemented in SCALE3 ABSPACK scaling algorithm.
;
_diffrn_ambient_temperature 296(2)
_diffrn_radiation_wavelength 0.71073
_diffrn_radiation_type MoK\alpha
_diffrn_source ?
_diffrn_measurement_device_type 'KM4 CCD four-circle diffractometer'
_diffrn_measurement_method '\w scans'
_diffrn_detector_area_resol_mean ?
_diffrn_reflns_number 5915
_diffrn_reflns_av_unetI/netI 0.0857
_diffrn_reflns_av_R_equivalents 0.0468
_diffrn_reflns_limit_h_min -9
_diffrn_reflns_limit_h_max 4
_diffrn_reflns_limit_k_min -10
_diffrn_reflns_limit_k_max 8
_diffrn_reflns_limit_l_min -20

```

```

_diffrn_reflns_limit_l_max      18
_diffrn_reflns_theta_min       2.669
_diffrn_reflns_theta_max       28.805
_diffrn_reflns_theta_full      25.242
_diffrn_measured_fraction_theta_max 0.856
_diffrn_measured_fraction_theta_full 0.996
_diffrn_reflns_Laue_measured_fraction_max 0.856
_diffrn_reflns_Laue_measured_fraction_full 0.996
_diffrn_reflns_point_group_measured_fraction_max 0.856
_diffrn_reflns_point_group_measured_fraction_full 0.996
_reflns_number_total           3773
_reflns_number_gt              1954
_reflns_threshold_expression    'I > 2\sigma(I)'
_reflns_Friedel_coverage       0.000
_reflns_Friedel_fraction_max   .
_reflns_Friedel_fraction_full  .

```

```
_reflns_special_details
```

```
;
```

Reflections were merged by SHELXL according to the crystal class for the calculation of statistics and refinement.

\_reflns\_Friedel\_fraction is defined as the number of unique Friedel pairs measured divided by the number that would be possible theoretically, ignoring centric projections and systematic absences.

```
;
```

```
_computing_data_collection
```

```
;
```

CrysAlisPro, Agilent Technologies,  
Version 1.171.37.35h (release 09-02-2015 CrysAlis171 .NET)  
(compiled Feb 9 2015,16:26:32)

```
;
```

```
_computing_cell_refinement
```

```
;
```

CrysAlisPro, Agilent Technologies,  
Version 1.171.37.35h (release 09-02-2015 CrysAlis171 .NET)  
(compiled Feb 9 2015,16:26:32)

```
;
```

```
_computing_data_reduction
```

```
;
```

CrysAlisPro, Agilent Technologies,  
Version 1.171.37.35h (release 09-02-2015 CrysAlis171 .NET)  
(compiled Feb 9 2015,16:26:32)

```
;
```

```
_computing_structure_solution 'Sir 92'
```

```
_computing_structure_refinement 'SHELXL-2014/7 (Sheldrick, 2014)'
```

```
_computing_molecular_graphics ?
```

```
_computing_publication_material ?
```

```
_refine_special_details ?
```

```
_refine_ls_structure_factor_coef Fsqd
```

```
_refine_ls_matrix_type full
```



```

_refine_ls_weighting_scheme    calc
_refine_ls_weighting_details
'w=1/[\s^2^(Fo^2^)+(0.0965P)^2^+0.0499P] where P=(Fo^2^+2Fc^2^)/3'
_atom_sites_solution_primary   refxyz
_atom_sites_solution_secondary ?
_atom_sites_solution_hydrogens mixed
_refine_ls_hydrogen_treatment  mixed
_refine_ls_extinction_method    none
_refine_ls_extinction_coef      .
_refine_ls_number_reflns        3773
_refine_ls_number_parameters     226
_refine_ls_number_restraints     0
_refine_ls_R_factor_all          0.1353
_refine_ls_R_factor_gt           0.0678
_refine_ls_wR_factor_ref         0.2275
_refine_ls_wR_factor_gt          0.1588
_refine_ls_goodness_of_fit_ref   1.011
_refine_ls_restrained_S_all      1.011
_refine_ls_shift/su_max          0.000
_refine_ls_shift/su_mean         0.000

```

loop\_

```

_atom_site_label
_atom_site_type_symbol
_atom_site_fract_x
_atom_site_fract_y
_atom_site_fract_z
_atom_site_U_iso_or_equiv
_atom_site_adp_type
_atom_site_occupancy
_atom_site_site_symmetry_order
_atom_site_calc_flag
_atom_site_refinement_flags_posn
_atom_site_refinement_flags_adp
_atom_site_refinement_flags_occupancy
_atom_site_disorder_assembly
_atom_site_disorder_group
C2 C 0.2206(6) 0.6428(5) 0.1250(3) 0.0481(10) Uani 1 1 d . . . . .
C6 C 0.1078(6) 0.7493(6) -0.0927(3) 0.0505(10) Uani 1 1 d . . . . .
C8 C 0.1430(7) 0.6477(5) -0.1719(3) 0.0553(11) Uani 1 1 d . . . . .
H8A H 0.0159 0.6734 -0.1909 0.083 Uiso 1 1 calc R U . . .
H8B H 0.2308 0.6830 -0.2196 0.083 Uiso 1 1 calc R U . . .
C21 C 0.2217(6) 0.7131(6) 0.2775(3) 0.0511(10) Uani 1 1 d . . . . .
C22 C 0.1902(7) 0.8574(6) 0.3238(3) 0.0593(12) Uani 1 1 d . . . . .
C23 C 0.2036(8) 0.8461(7) 0.4105(3) 0.0732(14) Uani 1 1 d . . . . .
H23 H 0.1790 0.9468 0.4392 0.110 Uiso 1 1 calc R U . . .
C24 C 0.2549(8) 0.6800(7) 0.4546(3) 0.0781(15) Uani 1 1 d . . . . .
H24 H 0.2668 0.6677 0.5135 0.117 Uiso 1 1 calc R U . . .
C25 C 0.2879(8) 0.5346(7) 0.4112(3) 0.0732(14) Uani 1 1 d . . . . .
H25 H 0.3202 0.4240 0.4414 0.110 Uiso 1 1 calc R U . . .
C26 C 0.2744(7) 0.5479(6) 0.3227(3) 0.0659(13) Uani 1 1 d . . . . .
H26 H 0.3006 0.4468 0.2940 0.099 Uiso 1 1 calc R U . . .
C31 C 0.2613(6) 0.3471(5) -0.2104(3) 0.0474(10) Uani 1 1 d . . . . .

```

C32 C 0.3406(6) 0.1683(5) -0.1835(3) 0.0514(10) Uani 1 1 d . . . . .  
 C33 C 0.3762(6) 0.0392(5) -0.2386(3) 0.0555(11) Uani 1 1 d . . . . .  
 H33 H 0.4313 -0.0800 -0.2203 0.083 Uiso 1 1 calc R U . . .  
 C34 C 0.3295(7) 0.0875(6) -0.3216(3) 0.0577(11) Uani 1 1 d . . . . .  
 C35 C 0.2507(7) 0.2638(6) -0.3507(3) 0.0596(12) Uani 1 1 d . . . . .  
 H35 H 0.2200 0.2951 -0.4069 0.089 Uiso 1 1 calc R U . . .  
 C36 C 0.2183(6) 0.3932(6) -0.2944(3) 0.0543(11) Uani 1 1 d . . . . .  
 H36 H 0.1672 0.5123 -0.3135 0.081 Uiso 1 1 calc R U . . .  
 N1 N 0.1907(6) 0.7525(5) 0.1891(2) 0.0535(9) Uani 1 1 d . . . . .  
 H1 H 0.127(7) 0.873(7) 0.178(3) 0.080 Uiso 1 1 d . U . . .  
 N4 N 0.1476(6) 0.7371(5) 0.0536(2) 0.0563(10) Uani 1 1 d . . . . .  
 H4 H 0.105(8) 0.842(7) 0.050(3) 0.085 Uiso 1 1 d . U . . .  
 N5 N 0.1652(6) 0.6539(5) -0.0208(2) 0.0531(9) Uani 1 1 d . . . . .  
 H5 H 0.231(8) 0.553(6) -0.018(3) 0.080 Uiso 1 1 d . U . . .  
 O7 O 0.0273(5) 0.9126(4) -0.09606(18) 0.0644(9) Uani 1 1 d . . . . .  
 O9 O 0.2328(5) 0.4635(4) -0.14973(19) 0.0617(8) Uani 1 1 d . . . . .  
 F22 F 0.1367(4) 1.0207(3) 0.27979(17) 0.0774(8) Uani 1 1 d . . . . .  
 S3 S 0.33308(18) 0.42123(14) 0.12621(7) 0.0595(4) Uani 1 1 d . . . . .  
 Cl32 Cl 0.3970(2) 0.11022(16) -0.07871(8) 0.0750(4) Uani 1 1 d . . . . .  
 Cl34 Cl 0.3692(3) -0.07631(19) -0.39167(10) 0.0917(5) Uani 1 1 d . . . . .

loop\_

\_atom\_site\_aniso\_label  
 \_atom\_site\_aniso\_U\_11  
 \_atom\_site\_aniso\_U\_22  
 \_atom\_site\_aniso\_U\_33  
 \_atom\_site\_aniso\_U\_23  
 \_atom\_site\_aniso\_U\_13  
 \_atom\_site\_aniso\_U\_12  
 C2 0.042(2) 0.049(2) 0.045(2) 0.0017(18) -0.0088(18) -0.0099(19)  
 C6 0.048(2) 0.051(2) 0.049(2) 0.0023(19) -0.0103(19) -0.015(2)  
 C8 0.068(3) 0.044(2) 0.052(3) -0.0021(18) -0.016(2) -0.015(2)  
 C21 0.047(2) 0.060(3) 0.041(2) -0.0055(19) -0.0077(18) -0.012(2)  
 C22 0.057(3) 0.056(3) 0.055(3) -0.005(2) -0.007(2) -0.011(2)  
 C23 0.076(3) 0.078(3) 0.058(3) -0.019(3) -0.018(3) -0.012(3)  
 C24 0.087(4) 0.083(4) 0.052(3) -0.004(3) -0.022(3) -0.013(3)  
 C25 0.079(4) 0.065(3) 0.052(3) 0.008(2) -0.014(3) -0.005(3)  
 C26 0.074(3) 0.061(3) 0.052(3) 0.002(2) -0.009(2) -0.016(3)  
 C31 0.053(2) 0.043(2) 0.043(2) -0.0031(17) -0.0115(19) -0.0127(19)  
 C32 0.048(2) 0.048(2) 0.054(3) 0.0001(19) -0.014(2) -0.012(2)  
 C33 0.055(3) 0.044(2) 0.057(3) -0.003(2) -0.010(2) -0.007(2)  
 C34 0.060(3) 0.056(3) 0.054(3) -0.015(2) -0.005(2) -0.018(2)  
 C35 0.066(3) 0.068(3) 0.043(2) -0.005(2) -0.011(2) -0.022(3)  
 C36 0.061(3) 0.045(2) 0.051(3) 0.0004(19) -0.013(2) -0.013(2)  
 N1 0.061(2) 0.0426(19) 0.049(2) 0.0005(16) -0.0165(17) -0.0074(17)  
 N4 0.074(3) 0.046(2) 0.0390(19) -0.0045(16) -0.0198(18) -0.007(2)  
 N5 0.062(2) 0.0420(19) 0.045(2) -0.0001(16) -0.0135(17) -0.0068(18)  
 O7 0.093(2) 0.0392(16) 0.0544(18) 0.0000(13) -0.0240(16) -0.0123(16)  
 O9 0.086(2) 0.0407(16) 0.0536(18) -0.0047(13) -0.0265(16) -0.0113(15)  
 F22 0.101(2) 0.0525(16) 0.0723(19) -0.0028(13) -0.0290(16) -0.0155(15)  
 S3 0.0625(8) 0.0463(6) 0.0578(7) -0.0024(5) -0.0150(6) -0.0055(5)  
 Cl32 0.0971(10) 0.0647(8) 0.0578(7) 0.0106(6) -0.0364(7) -0.0175(7)  
 Cl34 0.1134(12) 0.0716(9) 0.0793(9) -0.0313(7) -0.0160(8) -0.0148(8)

\_geom\_special\_details

;

All esds (except the esd in the dihedral angle between two l.s. planes) are estimated using the full covariance matrix. The cell esds are taken into account individually in the estimation of esds in distances, angles and torsion angles; correlations between esds in cell parameters are only used when they are defined by crystal symmetry. An approximate (isotropic) treatment of cell esds is used for estimating esds involving l.s. planes.

;

loop\_

\_geom\_bond\_atom\_site\_label\_1

\_geom\_bond\_atom\_site\_label\_2

\_geom\_bond\_distance

\_geom\_bond\_site\_symmetry\_2

\_geom\_bond\_publ\_flag

C2 N4 1.350(5) . ?

C2 N1 1.363(5) . ?

C2 S3 1.676(4) . ?

C6 O7 1.233(5) . ?

C6 N5 1.323(5) . ?

C6 C8 1.507(5) . ?

C8 O9 1.418(5) . ?

C8 H8A 0.9700 . ?

C8 H8B 0.9700 . ?

C21 C22 1.388(6) . ?

C21 C26 1.389(6) . ?

C21 N1 1.420(5) . ?

C22 C23 1.367(6) . ?

C22 F22 1.369(5) . ?

C23 C24 1.388(7) . ?

C23 H23 0.9300 . ?

C24 C25 1.366(7) . ?

C24 H24 0.9300 . ?

C25 C26 1.394(6) . ?

C25 H25 0.9300 . ?

C26 H26 0.9300 . ?

C31 O9 1.364(5) . ?

C31 C36 1.383(6) . ?

C31 C32 1.390(6) . ?

C32 C33 1.368(5) . ?

C32 Cl32 1.730(4) . ?

C33 C34 1.376(6) . ?

C33 H33 0.9300 . ?

C34 C35 1.382(6) . ?

C34 Cl34 1.746(4) . ?

C35 C36 1.387(6) . ?

C35 H35 0.9300 . ?

C36 H36 0.9300 . ?

N1 H1 0.92(5) . ?

N4 N5 1.385(5) . ?

N4 H4 0.79(5) . ?

N5 H5 0.78(5) . ?

loop\_

\_geom\_angle\_atom\_site\_label\_1  
\_geom\_angle\_atom\_site\_label\_2  
\_geom\_angle\_atom\_site\_label\_3  
\_geom\_angle  
\_geom\_angle\_site\_symmetry\_1  
\_geom\_angle\_site\_symmetry\_3  
\_geom\_angle\_publ\_flag  
N4 C2 N1 110.7(3) . . ?  
N4 C2 S3 120.7(3) . . ?  
N1 C2 S3 128.6(3) . . ?  
O7 C6 N5 123.0(4) . . ?  
O7 C6 C8 120.5(4) . . ?  
N5 C6 C8 116.5(4) . . ?  
O9 C8 C6 109.0(3) . . ?  
O9 C8 H8A 109.9 . . ?  
C6 C8 H8A 109.9 . . ?  
O9 C8 H8B 109.9 . . ?  
C6 C8 H8B 109.9 . . ?  
H8A C8 H8B 108.3 . . ?  
C22 C21 C26 117.0(4) . . ?  
C22 C21 N1 115.7(4) . . ?  
C26 C21 N1 127.2(4) . . ?  
C23 C22 F22 118.7(4) . . ?  
C23 C22 C21 124.0(4) . . ?  
F22 C22 C21 117.3(4) . . ?  
C22 C23 C24 118.1(5) . . ?  
C22 C23 H23 121.0 . . ?  
C24 C23 H23 121.0 . . ?  
C25 C24 C23 119.7(5) . . ?  
C25 C24 H24 120.2 . . ?  
C23 C24 H24 120.2 . . ?  
C24 C25 C26 121.6(5) . . ?  
C24 C25 H25 119.2 . . ?  
C26 C25 H25 119.2 . . ?  
C21 C26 C25 119.6(5) . . ?  
C21 C26 H26 120.2 . . ?  
C25 C26 H26 120.2 . . ?  
O9 C31 C36 125.4(4) . . ?  
O9 C31 C32 115.8(4) . . ?  
C36 C31 C32 118.8(4) . . ?  
C33 C32 C31 121.1(4) . . ?  
C33 C32 Cl32 120.0(3) . . ?  
C31 C32 Cl32 118.9(3) . . ?  
C32 C33 C34 119.3(4) . . ?  
C32 C33 H33 120.4 . . ?  
C34 C33 H33 120.4 . . ?  
C33 C34 C35 121.3(4) . . ?  
C33 C34 Cl34 119.6(4) . . ?  
C35 C34 Cl34 119.1(4) . . ?  
C34 C35 C36 118.7(4) . . ?

C34 C35 H35 120.6 . . ?  
 C36 C35 H35 120.6 . . ?  
 C31 C36 C35 120.7(4) . . ?  
 C31 C36 H36 119.6 . . ?  
 C35 C36 H36 119.6 . . ?  
 C2 N1 C21 130.6(4) . . ?  
 C2 N1 H1 118(3) . . ?  
 C21 N1 H1 111(3) . . ?  
 C2 N4 N5 121.0(3) . . ?  
 C2 N4 H4 122(4) . . ?  
 N5 N4 H4 116(4) . . ?  
 C6 N5 N4 120.2(3) . . ?  
 C6 N5 H5 126(4) . . ?  
 N4 N5 H5 113(4) . . ?  
 C31 O9 C8 118.3(3) . . ?

loop\_

\_geom\_torsion\_atom\_site\_label\_1  
 \_geom\_torsion\_atom\_site\_label\_2  
 \_geom\_torsion\_atom\_site\_label\_3  
 \_geom\_torsion\_atom\_site\_label\_4  
 \_geom\_torsion  
 \_geom\_torsion\_site\_symmetry\_1  
 \_geom\_torsion\_site\_symmetry\_2  
 \_geom\_torsion\_site\_symmetry\_3  
 \_geom\_torsion\_site\_symmetry\_4  
 \_geom\_torsion\_publ\_flag  
 O7 C6 C8 O9 -178.7(4) . . . . ?  
 N5 C6 C8 O9 0.4(5) . . . . ?  
 C26 C21 C22 C23 -1.6(7) . . . . ?  
 N1 C21 C22 C23 176.8(4) . . . . ?  
 C26 C21 C22 F22 -179.5(4) . . . . ?  
 N1 C21 C22 F22 -1.1(6) . . . . ?  
 F22 C22 C23 C24 179.0(4) . . . . ?  
 C21 C22 C23 C24 1.1(8) . . . . ?  
 C22 C23 C24 C25 -0.7(8) . . . . ?  
 C23 C24 C25 C26 1.0(8) . . . . ?  
 C22 C21 C26 C25 1.7(7) . . . . ?  
 N1 C21 C26 C25 -176.5(4) . . . . ?  
 C24 C25 C26 C21 -1.5(8) . . . . ?  
 O9 C31 C32 C33 -179.9(4) . . . . ?  
 C36 C31 C32 C33 0.0(6) . . . . ?  
 O9 C31 C32 Cl32 -0.5(5) . . . . ?  
 C36 C31 C32 Cl32 179.3(3) . . . . ?  
 C31 C32 C33 C34 -1.0(7) . . . . ?  
 Cl32 C32 C33 C34 179.6(3) . . . . ?  
 C32 C33 C34 C35 1.1(7) . . . . ?  
 C32 C33 C34 Cl34 -178.6(3) . . . . ?  
 C33 C34 C35 C36 -0.1(7) . . . . ?  
 Cl34 C34 C35 C36 179.6(3) . . . . ?  
 O9 C31 C36 C35 -179.1(4) . . . . ?  
 C32 C31 C36 C35 1.0(6) . . . . ?  
 C34 C35 C36 C31 -0.9(7) . . . . ?

N4 C2 N1 C21 172.2(4) . . . . ?  
 S3 C2 N1 C21 -8.7(7) . . . . ?  
 C22 C21 N1 C2 175.3(4) . . . . ?  
 C26 C21 N1 C2 -6.5(7) . . . . ?  
 N1 C2 N4 N5 178.5(4) . . . . ?  
 S3 C2 N4 N5 -0.6(6) . . . . ?  
 O7 C6 N5 N4 -4.1(6) . . . . ?  
 C8 C6 N5 N4 176.8(4) . . . . ?  
 C2 N4 N5 C6 -174.4(4) . . . . ?  
 C36 C31 O9 C8 3.2(6) . . . . ?  
 C32 C31 O9 C8 -176.9(4) . . . . ?  
 C6 C8 O9 C31 174.5(3) . . . . ?

\_refine\_diff\_density\_max 0.354  
 \_refine\_diff\_density\_min -0.358  
 \_refine\_diff\_density\_rms 0.071

\_shelx\_res\_file  
 ;

shelx.res created by SHELXL-2014/7

TITL SIR92 run in space group P -1  
 CELL 0.71073 7.3174 8.2010 15.6288 82.251 78.022 67.010  
 ZERR 2.00 0.0013 0.0016 0.0021 0.014 0.014 0.020  
 LATT 1  
 SFAC C H N O F S CL  
 UNIT 30 24 6 4 2 2 4  
 MERG 2  
 FMAP 2  
 PLAN -10  
 ACTA  
 BOND \$H  
 CONF  
 L.S. 30  
 WGHT 0.096500 0.049900  
 FVAR 2.73510  
 C2 1 0.220626 0.642811 0.125039 11.00000 0.04234 0.04917 =  
     0.04527 0.00170 -0.00879 -0.00994  
 C6 1 0.107835 0.749289 -0.092679 11.00000 0.04835 0.05054 =  
     0.04882 0.00230 -0.01026 -0.01501  
 C8 1 0.142958 0.647653 -0.171879 11.00000 0.06759 0.04368 =  
     0.05159 -0.00213 -0.01647 -0.01462  
 AFIX 23  
 H8A 2 0.015933 0.673443 -0.190877 11.00000 -1.50000  
 H8B 2 0.230779 0.682957 -0.219583 11.00000 -1.50000  
 AFIX 0  
 C21 1 0.221660 0.713068 0.277507 11.00000 0.04656 0.05968 =  
     0.04059 -0.00550 -0.00770 -0.01195  
 C22 1 0.190213 0.857373 0.323809 11.00000 0.05692 0.05607 =  
     0.05469 -0.00455 -0.00692 -0.01113  
 C23 1 0.203595 0.846116 0.410544 11.00000 0.07613 0.07772 =

0.05772 -0.01899 -0.01757 -0.01218  
 AFIX 43  
 H23 2 0.179032 0.946840 0.439158 11.00000 -1.50000  
 AFIX 0  
 C24 1 0.254917 0.679953 0.454644 11.00000 0.08663 0.08252 =  
 0.05246 -0.00369 -0.02214 -0.01314  
 AFIX 43  
 H24 2 0.266767 0.667661 0.513494 11.00000 -1.50000  
 AFIX 0  
 C25 1 0.287924 0.534604 0.411184 11.00000 0.07950 0.06506 =  
 0.05221 0.00803 -0.01408 -0.00482  
 AFIX 43  
 H25 2 0.320209 0.424015 0.441407 11.00000 -1.50000  
 AFIX 0  
 C26 1 0.274426 0.547889 0.322656 11.00000 0.07381 0.06066 =  
 0.05233 0.00221 -0.00865 -0.01643  
 AFIX 43  
 H26 2 0.300587 0.446791 0.294019 11.00000 -1.50000  
 AFIX 0  
 C31 1 0.261316 0.347059 -0.210353 11.00000 0.05318 0.04292 =  
 0.04304 -0.00307 -0.01151 -0.01274  
 C32 1 0.340640 0.168348 -0.183478 11.00000 0.04798 0.04824 =  
 0.05392 0.00009 -0.01360 -0.01213  
 C33 1 0.376171 0.039212 -0.238630 11.00000 0.05488 0.04355 =  
 0.05737 -0.00325 -0.01011 -0.00676  
 AFIX 43  
 H33 2 0.431281 -0.079982 -0.220277 11.00000 -1.50000  
 AFIX 0  
 C34 1 0.329507 0.087531 -0.321570 11.00000 0.06043 0.05636 =  
 0.05357 -0.01478 -0.00460 -0.01777  
 C35 1 0.250704 0.263790 -0.350672 11.00000 0.06610 0.06802 =  
 0.04344 -0.00541 -0.01144 -0.02206  
 AFIX 43  
 H35 2 0.219955 0.295053 -0.406901 11.00000 -1.50000  
 AFIX 0  
 C36 1 0.218339 0.393178 -0.294449 11.00000 0.06142 0.04508 =  
 0.05120 0.00038 -0.01329 -0.01345  
 AFIX 43  
 H36 2 0.167175 0.512277 -0.313485 11.00000 -1.50000  
 AFIX 0  
 N1 3 0.190740 0.752467 0.189114 11.00000 0.06061 0.04257 =  
 0.04872 0.00048 -0.01654 -0.00743  
 H1 2 0.126818 0.872675 0.177614 11.00000 -1.50000  
 N4 3 0.147616 0.737145 0.053584 11.00000 0.07392 0.04642 =  
 0.03903 -0.00447 -0.01975 -0.00651  
 H4 2 0.105274 0.841547 0.049600 11.00000 -1.50000  
 N5 3 0.165239 0.653940 -0.020846 11.00000 0.06183 0.04204 =  
 0.04481 -0.00014 -0.01345 -0.00680  
 H5 2 0.231366 0.552580 -0.017922 11.00000 -1.50000  
 O7 4 0.027253 0.912552 -0.096064 11.00000 0.09263 0.03919 =  
 0.05445 -0.00001 -0.02396 -0.01230  
 O9 4 0.232821 0.463490 -0.149730 11.00000 0.08644 0.04065 =  
 0.05361 -0.00466 -0.02649 -0.01127

```

F22 5 0.136727 1.020692 0.279788 11.00000 0.10140 0.05251 =
      0.07226 -0.00284 -0.02904 -0.01545
S3 6 0.333081 0.421226 0.126213 11.00000 0.06245 0.04634 =
      0.05779 -0.00238 -0.01498 -0.00552
CL32 7 0.396973 0.110223 -0.078711 11.00000 0.09713 0.06473 =
      0.05783 0.01063 -0.03641 -0.01751
CL34 7 0.369236 -0.076307 -0.391672 11.00000 0.11343 0.07162 =
      0.07929 -0.03133 -0.01600 -0.01476

```

HKLF 4

REM SIR92 run in space group P -1

REM R1 = 0.0678 for 1954 Fo > 4sig(Fo) and 0.1353 for all 3773 data

REM 226 parameters refined using 0 restraints

END

WGHT 0.0899 0.0000

REM Highest difference peak 0.354, deepest hole -0.358, 1-sigma level 0.071

```

Q1 1 0.4668 -0.0614 -0.0517 11.00000 0.05 0.35
Q2 1 0.1211 1.0457 0.2056 11.00000 0.05 0.32
Q3 1 0.5270 -0.0777 -0.4115 11.00000 0.05 0.26
Q4 1 0.4157 0.0666 -0.0034 11.00000 0.05 0.26
Q5 1 0.4971 0.2470 -0.0201 11.00000 0.05 0.26
Q6 1 0.3743 0.4009 0.1943 11.00000 0.05 0.25
Q7 1 0.1689 0.9977 0.4314 11.00000 0.05 0.25
Q8 1 0.3971 0.1427 -0.1584 11.00000 0.05 0.25
Q9 1 0.4259 -0.0978 -0.3266 11.00000 0.05 0.25
Q10 1 0.5331 -0.1012 -0.3889 11.00000 0.05 0.25
;

```

## **PK2**

data\_shelx

```

_audit_creation_method      'SHELXL-2014/7'
_shelx_SHELXL_version_number '2014/7'
_chemical_name_systematic   ?
_chemical_name_common       ?
_chemical_melting_point     ?
_chemical_formula_moiety     'C16 H15 Cl2 N3 O2 S2'
_chemical_formula_sum        'C16 H15 Cl2 N3 O2 S2'
_chemical_formula_weight     416.33

```

loop\_

```

_atom_type_symbol
_atom_type_description
_atom_type_scatter_dispersion_real
_atom_type_scatter_dispersion_imag
_atom_type_scatter_source

```



'C' 'C' 0.0033 0.0016  
 'International Tables Vol C Tables 4.2.6.8 and 6.1.1.4'  
 'H' 'H' 0.0000 0.0000  
 'International Tables Vol C Tables 4.2.6.8 and 6.1.1.4'  
 'N' 'N' 0.0061 0.0033  
 'International Tables Vol C Tables 4.2.6.8 and 6.1.1.4'  
 'O' 'O' 0.0106 0.0060  
 'International Tables Vol C Tables 4.2.6.8 and 6.1.1.4'  
 'S' 'S' 0.1246 0.1234  
 'International Tables Vol C Tables 4.2.6.8 and 6.1.1.4'  
 'Cl' 'Cl' 0.1484 0.1585  
 'International Tables Vol C Tables 4.2.6.8 and 6.1.1.4'

\_space\_group\_crystal\_system triclinic  
 \_space\_group\_IT\_number 2  
 \_space\_group\_name\_H-M\_alt 'P -1'  
 \_space\_group\_name\_Hall '-P 1'

\_shelx\_space\_group\_comment

;

The symmetry employed for this shelxl refinement is uniquely defined by the following loop, which should always be used as a source of symmetry information in preference to the above space-group names. They are only intended as comments.

;

loop\_

\_space\_group\_symop\_operation\_xyz

'x, y, z'

'-x, -y, -z'

\_cell\_length\_a 9.1146(7)  
 \_cell\_length\_b 9.6738(8)  
 \_cell\_length\_c 10.6620(8)  
 \_cell\_angle\_alpha 85.735(6)  
 \_cell\_angle\_beta 79.293(6)  
 \_cell\_angle\_gamma 76.631(7)  
 \_cell\_volume 898.21(13)  
 \_cell\_formula\_units\_Z 2  
 \_cell\_measurement\_temperature 296(2)  
 \_cell\_measurement\_reflns\_used 2425  
 \_cell\_measurement\_theta\_min 2.1860  
 \_cell\_measurement\_theta\_max 28.6400

\_exptl\_crystal\_description block  
 \_exptl\_crystal\_colour colourless  
 \_exptl\_crystal\_density\_meas ?  
 \_exptl\_crystal\_density\_method ?  
 \_exptl\_crystal\_density\_diffrn 1.539  
 \_exptl\_crystal\_F\_000 428  
 \_exptl\_transmission\_factor\_min ?  
 \_exptl\_transmission\_factor\_max ?  
 \_exptl\_crystal\_size\_max 0.60

```

_exptl_crystal_size_mid      0.50
_exptl_crystal_size_min      0.40
_exptl_absorpt_coefficient_mu 0.609
_shelx_estimated_absorpt_T_min ?
_shelx_estimated_absorpt_T_max ?
_exptl_absorpt_correction_T_min      0.86045
_exptl_absorpt_correction_T_max      1.00000
_exptl_absorpt_correction_type      'multi-scan'
_exptl_absorpt_process_details
;
CrysAlisPro, Agilent Technologies,
Version 1.171.37.35h (release 09-02-2015 CrysAlis171 .NET)
(compiled Feb  9 2015,16:26:32)
Empirical absorption correction using spherical harmonics,
implemented in SCALE3 ABSPACK scaling algorithm.
;
_exptl_absorpt_special_details ?
_diffn_ambient_temperature      296(2)
_diffn_radiation_wavelength      0.71073
_diffn_radiation_type      MoK\alpha
_diffn_source      ?
_diffn_measurement_device_type      'KM4 CCD four-circle diffractometer'
_diffn_measurement_method      ?
_diffn_detector_area_resol_mean ?
_diffn_reflns_number      6597
_diffn_reflns_av_unetI/netI      0.0395
_diffn_reflns_av_R_equivalents      0.0216
_diffn_reflns_limit_h_min      -11
_diffn_reflns_limit_h_max      11
_diffn_reflns_limit_k_min      -12
_diffn_reflns_limit_k_max      12
_diffn_reflns_limit_l_min      -12
_diffn_reflns_limit_l_max      13
_diffn_reflns_theta_min      2.165
_diffn_reflns_theta_max      28.846
_diffn_reflns_theta_full      25.242
_diffn_measured_fraction_theta_max      0.863
_diffn_measured_fraction_theta_full      1.000
_diffn_reflns_Laue_measured_fraction_max      0.863
_diffn_reflns_Laue_measured_fraction_full      1.000
_diffn_reflns_point_group_measured_fraction_max      0.863
_diffn_reflns_point_group_measured_fraction_full      1.000
_reflns_number_total      4067
_reflns_number_gt      3088
_reflns_threshold_expression      'I > 2\sigma(I)'
_reflns_Friedel_coverage      0.000
_reflns_Friedel_fraction_max      .
_reflns_Friedel_fraction_full      .

_reflns_special_details
;
Reflections were merged by SHELXL according to the crystal
class for the calculation of statistics and refinement.

```

\_reflns\_Friedel\_fraction is defined as the number of unique Friedel pairs measured divided by the number that would be possible theoretically, ignoring centric projections and systematic absences.

;

\_computing\_data\_collection

;

CrysAlisPro, Agilent Technologies,  
Version 1.171.37.35h (release 09-02-2015 CrysAlis171 .NET)  
(compiled Feb 9 2015,16:26:32)

;

\_computing\_cell\_refinement

;

CrysAlisPro, Agilent Technologies,  
Version 1.171.37.35h (release 09-02-2015 CrysAlis171 .NET)  
(compiled Feb 9 2015,16:26:32)

;

\_computing\_data\_reduction

;

CrysAlisPro, Agilent Technologies,  
Version 1.171.37.35h (release 09-02-2015 CrysAlis171 .NET)  
(compiled Feb 9 2015,16:26:32)

;

\_computing\_structure\_solution ?

\_computing\_structure\_refinement 'SHELXL-2014/7 (Sheldrick, 2014)'

\_computing\_molecular\_graphics ?

\_computing\_publication\_material ?

\_refine\_special\_details ?

\_refine\_ls\_structure\_factor\_coef Fsqd

\_refine\_ls\_matrix\_type full

\_refine\_ls\_weighting\_scheme calc

\_refine\_ls\_weighting\_details

'w=1/[\s^2^(Fo^2^)+(0.0616P)^2^+0.0996P] where P=(Fo^2^+2Fc^2^)/3'

\_atom\_sites\_solution\_primary direct

\_atom\_sites\_solution\_secondary difmap

\_atom\_sites\_solution\_hydrogens difmap

\_refine\_ls\_hydrogen\_treatment mixed

\_refine\_ls\_extinction\_method 'SHELXL-2014/7 (Sheldrick 2014)'

\_refine\_ls\_extinction\_coef 0.0065(19)

\_refine\_ls\_extinction\_expression

'Fc^\*=kFc[1+0.001xFc^2^/l^3^/sin(2\q)]^-1/4^'

\_refine\_ls\_number\_reflns 4067

\_refine\_ls\_number\_parameters 236

\_refine\_ls\_number\_restraints 0

\_refine\_ls\_R\_factor\_all 0.0564

\_refine\_ls\_R\_factor\_gt 0.0391

\_refine\_ls\_wR\_factor\_ref 0.1196

\_refine\_ls\_wR\_factor\_gt 0.1068

\_refine\_ls\_goodness\_of\_fit\_ref 1.026

\_refine\_ls\_restrained\_S\_all 1.026

\_refine\_ls\_shift/su\_max 0.001

\_refine\_ls\_shift/su\_mean        0.000

loop\_

\_atom\_site\_label

\_atom\_site\_type\_symbol

\_atom\_site\_fract\_x

\_atom\_site\_fract\_y

\_atom\_site\_fract\_z

\_atom\_site\_U\_iso\_or\_equiv

\_atom\_site\_adp\_type

\_atom\_site\_occupancy

\_atom\_site\_site\_symmetry\_order

\_atom\_site\_calc\_flag

\_atom\_site\_refinement\_flags\_posn

\_atom\_site\_refinement\_flags\_adp

\_atom\_site\_refinement\_flags\_occupancy

\_atom\_site\_disorder\_assembly

\_atom\_site\_disorder\_group

C2 C 0.4590(2) 0.2092(2) 0.3819(2) 0.0393(5) Uani 1 1 d . . . . .

C6 C 0.2303(2) 0.4713(2) 0.59658(19) 0.0359(5) Uani 1 1 d . . . . .

C8 C 0.0659(2) 0.5008(2) 0.6644(2) 0.0407(5) Uani 1 1 d . . . . .

H81 H 0.0621 0.4930 0.7561 0.061 Uiso 1 1 calc R U . . .

H82 H 0.0138 0.5963 0.6425 0.061 Uiso 1 1 calc R U . . .

C21 C 0.6735(2) 0.0870(2) 0.2222(2) 0.0399(5) Uani 1 1 d . . . . .

C22 C 0.8026(3) -0.0106(3) 0.2403(2) 0.0490(6) Uani 1 1 d . . . . .

H22 H 0.8375 -0.0144 0.3173 0.074 Uiso 1 1 calc R U . . .

C23 C 0.8827(3) -0.1039(3) 0.1464(2) 0.0497(6) Uani 1 1 d . . . . .

H23 H 0.9704 -0.1698 0.1608 0.075 Uiso 1 1 calc R U . . .

C24 C 0.8330(2) -0.0997(2) 0.0309(2) 0.0394(5) Uani 1 1 d . . . . .

C25 C 0.7008(3) -0.0018(3) 0.0130(2) 0.0492(6) Uani 1 1 d . . . . .

H25 H 0.6657 0.0021 -0.0640 0.074 Uiso 1 1 calc R U . . .

C26 C 0.6203(3) 0.0903(3) 0.1078(2) 0.0495(6) Uani 1 1 d . . . . .

H26 H 0.5307 0.1544 0.0951 0.074 Uiso 1 1 calc R U . . .

C28 C 1.0950(3) -0.3096(3) -0.0439(3) 0.0703(8) Uani 1 1 d . . . . .

H281 H 1.1532 -0.3750 -0.1078 0.105 Uiso 1 1 calc R U . . .

H282 H 1.1549 -0.2444 -0.0298 0.105 Uiso 1 1 calc R U . . .

H283 H 1.0687 -0.3612 0.0344 0.105 Uiso 1 1 calc R U . . .

C31 C -0.1524(2) 0.3955(2) 0.68688(19) 0.0351(4) Uani 1 1 d . . . . .

C32 C -0.2088(2) 0.2806(2) 0.6594(2) 0.0358(5) Uani 1 1 d . . . . .

C33 C -0.3526(2) 0.2646(2) 0.7162(2) 0.0407(5) Uani 1 1 d . . . . .

H33 H -0.3890 0.1873 0.6983 0.061 Uiso 1 1 calc R U . . .

C34 C -0.4415(2) 0.3652(2) 0.8001(2) 0.0394(5) Uani 1 1 d . . . . .

C35 C -0.3901(2) 0.4812(2) 0.8265(2) 0.0424(5) Uani 1 1 d . . . . .

H35 H -0.4524 0.5491 0.8820 0.064 Uiso 1 1 calc R U . . .

C36 C -0.2445(2) 0.4957(2) 0.7697(2) 0.0412(5) Uani 1 1 d . . . . .

H36 H -0.2088 0.5734 0.7876 0.062 Uiso 1 1 calc R U . . .

N1 N 0.6032(2) 0.1899(2) 0.3168(2) 0.0490(5) Uani 1 1 d . . . . .

H1 H 0.656(3) 0.242(3) 0.338(3) 0.074 Uiso 1 1 d . U . . .

N4 N 0.4254(2) 0.3143(2) 0.46681(19) 0.0441(5) Uani 1 1 d . . . . .

H4 H 0.483(3) 0.371(3) 0.463(2) 0.066 Uiso 1 1 d . U . . .

N5 N 0.2786(2) 0.3514(2) 0.53477(18) 0.0422(5) Uani 1 1 d . . . . .

H5 H 0.223(3) 0.295(3) 0.534(2) 0.063 Uiso 1 1 d . U . . .

O7 O 0.31237(17) 0.55590(16) 0.60108(15) 0.0446(4) Uani 1 1 d . . . . .

O9 O -0.00717(17) 0.39962(16) 0.62584(14) 0.0454(4) Uani 1 1 d . . . . .  
 S3 S 0.33160(7) 0.11565(7) 0.36549(7) 0.0561(2) Uani 1 1 d . . . . .  
 S27 S 0.92471(8) -0.21336(8) -0.09638(6) 0.0574(2) Uani 1 1 d . . . . .  
 Cl32 Cl -0.09596(6) 0.15841(6) 0.55079(6) 0.05271(19) Uani 1 1 d . . . . .  
 Cl34 Cl -0.62152(7) 0.34292(7) 0.87563(6) 0.0570(2) Uani 1 1 d . . . . .

loop\_

\_atom\_site\_aniso\_label  
 \_atom\_site\_aniso\_U\_11  
 \_atom\_site\_aniso\_U\_22  
 \_atom\_site\_aniso\_U\_33  
 \_atom\_site\_aniso\_U\_23  
 \_atom\_site\_aniso\_U\_13  
 \_atom\_site\_aniso\_U\_12  
 C2 0.0369(11) 0.0353(11) 0.0485(13) -0.0096(9) -0.0075(9) -0.0113(9)  
 C6 0.0367(11) 0.0387(12) 0.0363(11) -0.0063(9) -0.0068(8) -0.0142(9)  
 C8 0.0399(11) 0.0438(12) 0.0430(12) -0.0147(10) -0.0001(9) -0.0204(9)  
 C21 0.0327(10) 0.0404(12) 0.0490(13) -0.0133(10) -0.0031(9) -0.0125(9)  
 C22 0.0468(13) 0.0574(15) 0.0441(13) -0.0109(11) -0.0123(10) -0.0076(11)  
 C23 0.0421(12) 0.0531(15) 0.0518(14) -0.0112(11) -0.0120(10) -0.0005(10)  
 C24 0.0380(11) 0.0406(12) 0.0423(12) -0.0084(9) -0.0016(9) -0.0163(9)  
 C25 0.0513(14) 0.0534(15) 0.0478(13) -0.0094(11) -0.0157(11) -0.0136(11)  
 C26 0.0418(12) 0.0458(14) 0.0625(15) -0.0104(11) -0.0179(11) -0.0034(10)  
 C28 0.0553(16) 0.0722(19) 0.079(2) -0.0291(15) -0.0003(14) -0.0053(14)  
 C31 0.0336(10) 0.0350(11) 0.0388(11) -0.0059(9) -0.0045(8) -0.0118(8)  
 C32 0.0347(10) 0.0296(10) 0.0450(12) -0.0064(9) -0.0094(9) -0.0072(8)  
 C33 0.0382(11) 0.0342(11) 0.0541(13) -0.0028(10) -0.0110(10) -0.0139(9)  
 C34 0.0330(10) 0.0415(12) 0.0446(12) 0.0036(10) -0.0062(9) -0.0122(9)  
 C35 0.0418(12) 0.0415(12) 0.0434(12) -0.0072(10) -0.0012(9) -0.0114(9)  
 C36 0.0435(12) 0.0368(11) 0.0466(12) -0.0100(9) -0.0032(9) -0.0166(9)  
 N1 0.0350(10) 0.0515(12) 0.0646(13) -0.0264(10) -0.0013(9) -0.0160(9)  
 N4 0.0327(9) 0.0445(11) 0.0584(12) -0.0202(9) 0.0024(8) -0.0175(8)  
 N5 0.0369(9) 0.0424(11) 0.0512(11) -0.0167(8) 0.0023(8) -0.0198(8)  
 O7 0.0416(8) 0.0430(9) 0.0554(9) -0.0133(7) -0.0035(7) -0.0220(7)  
 O9 0.0371(8) 0.0506(9) 0.0539(9) -0.0221(7) 0.0039(7) -0.0233(7)  
 S3 0.0461(3) 0.0520(4) 0.0766(5) -0.0296(3) 0.0038(3) -0.0264(3)  
 S27 0.0532(4) 0.0628(4) 0.0583(4) -0.0264(3) -0.0023(3) -0.0151(3)  
 Cl32 0.0440(3) 0.0410(3) 0.0739(4) -0.0255(3) -0.0047(3) -0.0080(2)  
 Cl34 0.0380(3) 0.0653(4) 0.0678(4) 0.0006(3) 0.0010(3) -0.0209(3)

\_geom\_special\_details

;

All esds (except the esd in the dihedral angle between two l.s. planes) are estimated using the full covariance matrix. The cell esds are taken into account individually in the estimation of esds in distances, angles and torsion angles; correlations between esds in cell parameters are only used when they are defined by crystal symmetry. An approximate (isotropic) treatment of cell esds is used for estimating esds involving l.s. planes.

;

loop\_

\_geom\_bond\_atom\_site\_label\_1  
 \_geom\_bond\_atom\_site\_label\_2

\_geom\_bond\_distance  
 \_geom\_bond\_site\_symmetry\_2  
 \_geom\_bond\_publ\_flag  
 C2 N1 1.346(3) . ?  
 C2 N4 1.356(3) . ?  
 C2 S3 1.668(2) . ?  
 C6 O7 1.238(2) . ?  
 C6 N5 1.320(3) . ?  
 C6 C8 1.510(3) . ?  
 C8 O9 1.426(2) . ?  
 C8 H81 0.9700 . ?  
 C8 H82 0.9700 . ?  
 C21 C22 1.362(3) . ?  
 C21 C26 1.388(3) . ?  
 C21 N1 1.426(3) . ?  
 C22 C23 1.381(3) . ?  
 C22 H22 0.9300 . ?  
 C23 C24 1.383(3) . ?  
 C23 H23 0.9300 . ?  
 C24 C25 1.384(3) . ?  
 C24 S27 1.767(2) . ?  
 C25 C26 1.382(3) . ?  
 C25 H25 0.9300 . ?  
 C26 H26 0.9300 . ?  
 C28 S27 1.779(3) . ?  
 C28 H281 0.9600 . ?  
 C28 H282 0.9600 . ?  
 C28 H283 0.9600 . ?  
 C31 O9 1.370(2) . ?  
 C31 C36 1.378(3) . ?  
 C31 C32 1.398(3) . ?  
 C32 C33 1.376(3) . ?  
 C32 Cl32 1.731(2) . ?  
 C33 C34 1.378(3) . ?  
 C33 H33 0.9300 . ?  
 C34 C35 1.377(3) . ?  
 C34 Cl34 1.742(2) . ?  
 C35 C36 1.386(3) . ?  
 C35 H35 0.9300 . ?  
 C36 H36 0.9300 . ?  
 N1 H1 0.85(3) . ?  
 N4 N5 1.378(2) . ?  
 N4 H4 0.83(3) . ?  
 N5 H5 0.83(3) . ?

loop\_  
 \_geom\_angle\_atom\_site\_label\_1  
 \_geom\_angle\_atom\_site\_label\_2  
 \_geom\_angle\_atom\_site\_label\_3  
 \_geom\_angle  
 \_geom\_angle\_site\_symmetry\_1  
 \_geom\_angle\_site\_symmetry\_3  
 \_geom\_angle\_publ\_flag

N1 C2 N4 112.67(18) .. ?  
 N1 C2 S3 125.51(16) .. ?  
 N4 C2 S3 121.81(16) .. ?  
 O7 C6 N5 123.4(2) .. ?  
 O7 C6 C8 120.72(19) .. ?  
 N5 C6 C8 115.85(17) .. ?  
 O9 C8 C6 108.46(16) .. ?  
 O9 C8 H81 110.0 .. ?  
 C6 C8 H81 110.0 .. ?  
 O9 C8 H82 110.0 .. ?  
 C6 C8 H82 110.0 .. ?  
 H81 C8 H82 108.4 .. ?  
 C22 C21 C26 119.1(2) .. ?  
 C22 C21 N1 119.2(2) .. ?  
 C26 C21 N1 121.6(2) .. ?  
 C21 C22 C23 121.3(2) .. ?  
 C21 C22 H22 119.4 .. ?  
 C23 C22 H22 119.4 .. ?  
 C22 C23 C24 120.3(2) .. ?  
 C22 C23 H23 119.8 .. ?  
 C24 C23 H23 119.8 .. ?  
 C23 C24 C25 118.5(2) .. ?  
 C23 C24 S27 124.65(18) .. ?  
 C25 C24 S27 116.89(17) .. ?  
 C26 C25 C24 121.0(2) .. ?  
 C26 C25 H25 119.5 .. ?  
 C24 C25 H25 119.5 .. ?  
 C25 C26 C21 119.9(2) .. ?  
 C25 C26 H26 120.0 .. ?  
 C21 C26 H26 120.0 .. ?  
 S27 C28 H281 109.5 .. ?  
 S27 C28 H282 109.5 .. ?  
 H281 C28 H282 109.5 .. ?  
 S27 C28 H283 109.5 .. ?  
 H281 C28 H283 109.5 .. ?  
 H282 C28 H283 109.5 .. ?  
 O9 C31 C36 125.04(17) .. ?  
 O9 C31 C32 115.87(17) .. ?  
 C36 C31 C32 119.08(18) .. ?  
 C33 C32 C31 121.00(19) .. ?  
 C33 C32 Cl32 119.89(16) .. ?  
 C31 C32 Cl32 119.10(16) .. ?  
 C32 C33 C34 118.73(19) .. ?  
 C32 C33 H33 120.6 .. ?  
 C34 C33 H33 120.6 .. ?  
 C35 C34 C33 121.42(19) .. ?  
 C35 C34 Cl34 119.65(17) .. ?  
 C33 C34 Cl34 118.92(16) .. ?  
 C34 C35 C36 119.4(2) .. ?  
 C34 C35 H35 120.3 .. ?  
 C36 C35 H35 120.3 .. ?  
 C31 C36 C35 120.33(19) .. ?  
 C31 C36 H36 119.8 .. ?

C35 C36 H36 119.8 . . ?  
 C2 N1 C21 126.24(18) . . ?  
 C2 N1 H1 114.9(19) . . ?  
 C21 N1 H1 118.8(19) . . ?  
 C2 N4 N5 118.90(17) . . ?  
 C2 N4 H4 120.0(19) . . ?  
 N5 N4 H4 118.6(19) . . ?  
 C6 N5 N4 121.26(17) . . ?  
 C6 N5 H5 122.3(19) . . ?  
 N4 N5 H5 116.5(19) . . ?  
 C31 O9 C8 118.54(15) . . ?  
 C24 S27 C28 103.43(12) . . ?

loop\_

\_geom\_torsion\_atom\_site\_label\_1  
 \_geom\_torsion\_atom\_site\_label\_2  
 \_geom\_torsion\_atom\_site\_label\_3  
 \_geom\_torsion\_atom\_site\_label\_4  
 \_geom\_torsion  
 \_geom\_torsion\_site\_symmetry\_1  
 \_geom\_torsion\_site\_symmetry\_2  
 \_geom\_torsion\_site\_symmetry\_3  
 \_geom\_torsion\_site\_symmetry\_4  
 \_geom\_torsion\_publ\_flag  
 O7 C6 C8 O9 170.48(19) . . . . ?  
 N5 C6 C8 O9 -10.0(3) . . . . ?  
 C26 C21 C22 C23 1.2(4) . . . . ?  
 N1 C21 C22 C23 -174.0(2) . . . . ?  
 C21 C22 C23 C24 0.2(4) . . . . ?  
 C22 C23 C24 C25 -0.9(3) . . . . ?  
 C22 C23 C24 S27 -179.82(19) . . . . ?  
 C23 C24 C25 C26 0.3(3) . . . . ?  
 S27 C24 C25 C26 179.23(19) . . . . ?  
 C24 C25 C26 C21 1.2(4) . . . . ?  
 C22 C21 C26 C25 -1.9(4) . . . . ?  
 N1 C21 C26 C25 173.2(2) . . . . ?  
 O9 C31 C32 C33 179.25(19) . . . . ?  
 C36 C31 C32 C33 -1.7(3) . . . . ?  
 O9 C31 C32 Cl32 -1.5(3) . . . . ?  
 C36 C31 C32 Cl32 177.61(17) . . . . ?  
 C31 C32 C33 C34 0.8(3) . . . . ?  
 Cl32 C32 C33 C34 -178.51(16) . . . . ?  
 C32 C33 C34 C35 0.8(3) . . . . ?  
 C32 C33 C34 Cl34 -178.26(17) . . . . ?  
 C33 C34 C35 C36 -1.4(3) . . . . ?  
 Cl34 C34 C35 C36 177.64(17) . . . . ?  
 O9 C31 C36 C35 -180.0(2) . . . . ?  
 C32 C31 C36 C35 1.1(3) . . . . ?  
 C34 C35 C36 C31 0.4(3) . . . . ?  
 N4 C2 N1 C21 179.3(2) . . . . ?  
 S3 C2 N1 C21 0.2(4) . . . . ?  
 C22 C21 N1 C2 -121.0(3) . . . . ?  
 C26 C21 N1 C2 63.9(3) . . . . ?



N1 C2 N4 N5 176.2(2) . . . . ?  
 S3 C2 N4 N5 -4.7(3) . . . . ?  
 O7 C6 N5 N4 -2.0(3) . . . . ?  
 C8 C6 N5 N4 178.50(19) . . . . ?  
 C2 N4 N5 C6 -164.8(2) . . . . ?  
 C36 C31 O9 C8 10.6(3) . . . . ?  
 C32 C31 O9 C8 -170.36(18) . . . . ?  
 C6 C8 O9 C31 172.41(18) . . . . ?  
 C23 C24 S27 C28 -6.2(2) . . . . ?  
 C25 C24 S27 C28 174.88(19) . . . . ?

\_refine\_diff\_density\_max 0.256  
 \_refine\_diff\_density\_min -0.300  
 \_refine\_diff\_density\_rms 0.047

\_shelx\_res\_file  
 ;

shelx.res created by SHELXL-2014/7

TITL SIR92 run in space group P -1  
 CELL 0.71073 9.1146 9.6738 10.6620 85.735 79.293 76.631  
 ZERR 2.00 0.0007 0.0008 0.0008 0.006 0.006 0.007  
 LATT 1  
 SFAC C H N O S CL  
 UNIT 32 30 6 4 4 4  
 MERG 2  
 FMAP 2  
 PLAN -2  
 OMIT 0 0 1  
 ACTA  
 BOND \$H  
 CONF  
 L.S. 80  
 TEMP 23.00  
 WGHT 0.061600 0.099600  
 EXTI 0.006535  
 FVAR 6.36053  
 C2 1 0.458978 0.209235 0.381875 11.00000 0.03694 0.03533 =  
     0.04853 -0.00964 -0.00745 -0.01125  
 C6 1 0.230314 0.471338 0.596577 11.00000 0.03673 0.03868 =  
     0.03627 -0.00629 -0.00679 -0.01420  
 C8 1 0.065941 0.500776 0.664354 11.00000 0.03990 0.04380 =  
     0.04303 -0.01474 -0.00005 -0.02039  
 AFIX 23  
 H81 2 0.062132 0.493036 0.756078 11.00000 -1.50000  
 H82 2 0.013807 0.596340 0.642459 11.00000 -1.50000  
 AFIX 0  
 C21 1 0.673520 0.086951 0.222151 11.00000 0.03265 0.04041 =  
     0.04905 -0.01330 -0.00306 -0.01247  
 C22 1 0.802632 -0.010585 0.240254 11.00000 0.04678 0.05745 =  
     0.04406 -0.01088 -0.01228 -0.00760

AFIX 43  
 H22 2 0.837548 -0.014412 0.317314 11.00000 -1.50000  
 AFIX 0  
 C23 1 0.882658 -0.103889 0.146352 11.00000 0.04212 0.05312 =  
 0.05178 -0.01124 -0.01201 -0.00047  
 AFIX 43  
 H23 2 0.970356 -0.169816 0.160821 11.00000 -1.50000  
 AFIX 0  
 C24 1 0.832986 -0.099739 0.030894 11.00000 0.03797 0.04057 =  
 0.04227 -0.00836 -0.00161 -0.01633  
 C25 1 0.700828 -0.001805 0.013003 11.00000 0.05128 0.05337 =  
 0.04784 -0.00936 -0.01571 -0.01365  
 AFIX 43  
 H25 2 0.665666 0.002088 -0.063953 11.00000 -1.50000  
 AFIX 0  
 C26 1 0.620348 0.090290 0.107833 11.00000 0.04181 0.04582 =  
 0.06253 -0.01043 -0.01788 -0.00338  
 AFIX 43  
 H26 2 0.530716 0.154399 0.095093 11.00000 -1.50000  
 AFIX 0  
 C28 1 1.094957 -0.309558 -0.043864 11.00000 0.05533 0.07219 =  
 0.07854 -0.02906 -0.00032 -0.00533  
 AFIX 33  
 H281 2 1.153196 -0.374999 -0.107803 11.00000 -1.50000  
 H282 2 1.154877 -0.244403 -0.029816 11.00000 -1.50000  
 H283 2 1.068667 -0.361182 0.034363 11.00000 -1.50000  
 AFIX 0  
 C31 1 -0.152426 0.395516 0.686880 11.00000 0.03360 0.03495 =  
 0.03877 -0.00585 -0.00445 -0.01181  
 C32 1 -0.208832 0.280637 0.659385 11.00000 0.03467 0.02960 =  
 0.04500 -0.00640 -0.00942 -0.00717  
 C33 1 -0.352579 0.264597 0.716193 11.00000 0.03816 0.03418 =  
 0.05410 -0.00275 -0.01098 -0.01391  
 AFIX 43  
 H33 2 -0.389049 0.187337 0.698340 11.00000 -1.50000  
 AFIX 0  
 C34 1 -0.441515 0.365243 0.800084 11.00000 0.03301 0.04152 =  
 0.04465 0.00358 -0.00617 -0.01222  
 C35 1 -0.390076 0.481166 0.826508 11.00000 0.04184 0.04152 =  
 0.04335 -0.00718 -0.00122 -0.01138  
 AFIX 43  
 H35 2 -0.452439 0.549121 0.881956 11.00000 -1.50000  
 AFIX 0  
 C36 1 -0.244532 0.495678 0.769738 11.00000 0.04353 0.03677 =  
 0.04655 -0.00995 -0.00320 -0.01659  
 AFIX 43  
 H36 2 -0.208843 0.573388 0.787644 11.00000 -1.50000  
 AFIX 0  
 N1 3 0.603231 0.189875 0.316787 11.00000 0.03500 0.05152 =  
 0.06460 -0.02642 -0.00131 -0.01596  
 H1 2 0.656317 0.242488 0.338320 11.00000 -1.50000  
 N4 3 0.425408 0.314331 0.466810 11.00000 0.03267 0.04451 =  
 0.05840 -0.02019 0.00242 -0.01746

H4 2 0.482648 0.371071 0.462616 11.00000 -1.50000  
 N5 3 0.278621 0.351426 0.534765 11.00000 0.03687 0.04239 =  
 0.05122 -0.01673 0.00231 -0.01984  
 H5 2 0.222695 0.295053 0.533819 11.00000 -1.50000  
 O7 4 0.312371 0.555904 0.601081 11.00000 0.04158 0.04303 =  
 0.05543 -0.01334 -0.00348 -0.02200  
 O9 4 -0.007174 0.399621 0.625838 11.00000 0.03707 0.05060 =  
 0.05392 -0.02206 0.00387 -0.02328  
 S3 5 0.331603 0.115652 0.365485 11.00000 0.04610 0.05198 =  
 0.07662 -0.02958 0.00384 -0.02643  
 S27 5 0.924709 -0.213359 -0.096378 11.00000 0.05324 0.06282 =  
 0.05826 -0.02645 -0.00229 -0.01510  
 CL32 6 -0.095956 0.158411 0.550785 11.00000 0.04399 0.04099 =  
 0.07394 -0.02546 -0.00467 -0.00804  
 CL34 6 -0.621521 0.342918 0.875628 11.00000 0.03798 0.06534 =  
 0.06777 0.00064 0.00097 -0.02086  
 HKLF 4

REM SIR92 run in space group P -1

REM R1 = 0.0391 for 3088 Fo > 4sig(Fo) and 0.0564 for all 4067 data

REM 236 parameters refined using 0 restraints

END

WGHT 0.0426 0.1831

REM Highest difference peak 0.256, deepest hole -0.300, 1-sigma level 0.047

Q1 1 -0.1912 0.4331 0.7382 11.00000 0.05 0.26

Q2 1 0.8989 -0.2832 -0.0368 11.00000 0.05 0.25

;

## **PK7**

data\_shelx

\_audit\_creation\_method 'SHELXL-2014/7'  
 \_shelx\_SHELXL\_version\_number '2014/7'  
 \_chemical\_name\_systematic ?  
 \_chemical\_name\_common ?  
 \_chemical\_melting\_point ?  
 \_chemical\_formula\_moiety 'C15 H12 Cl2 I N3 O2 S'  
 \_chemical\_formula\_sum 'C15 H12 Cl2 I N3 O2 S'  
 \_chemical\_formula\_weight 496.14

loop\_

\_atom\_type\_symbol  
 \_atom\_type\_description  
 \_atom\_type\_scatter\_dispersion\_real  
 \_atom\_type\_scatter\_dispersion\_imag  
 \_atom\_type\_scatter\_source  
 'C' 'C' 0.0033 0.0016  
 'International Tables Vol C Tables 4.2.6.8 and 6.1.1.4'

'H' 'H' 0.0000 0.0000  
 'International Tables Vol C Tables 4.2.6.8 and 6.1.1.4'  
 'N' 'N' 0.0061 0.0033  
 'International Tables Vol C Tables 4.2.6.8 and 6.1.1.4'  
 'O' 'O' 0.0106 0.0060  
 'International Tables Vol C Tables 4.2.6.8 and 6.1.1.4'  
 'S' 'S' 0.1246 0.1234  
 'International Tables Vol C Tables 4.2.6.8 and 6.1.1.4'  
 'Cl' 'Cl' 0.1484 0.1585  
 'International Tables Vol C Tables 4.2.6.8 and 6.1.1.4'  
 'T' 'T' -0.4742 1.8119  
 'International Tables Vol C Tables 4.2.6.8 and 6.1.1.4'

\_space\_group\_crystal\_system monoclinic  
 \_space\_group\_IT\_number 15  
 \_space\_group\_name\_H-M\_alt 'C 2/c'  
 \_space\_group\_name\_Hall '-C 2yc'

\_shelx\_space\_group\_comment

;

The symmetry employed for this shelxl refinement is uniquely defined  
 by the following loop, which should always be used as a source of  
 symmetry information in preference to the above space-group names.  
 They are only intended as comments.

;

loop\_

\_space\_group\_symop\_operation\_xyz  
 'x, y, z'  
 '-x, y, -z+1/2'  
 'x+1/2, y+1/2, z'  
 '-x+1/2, y+1/2, -z+1/2'  
 '-x, -y, -z'  
 'x, -y, z-1/2'  
 '-x+1/2, -y+1/2, -z'  
 'x+1/2, -y+1/2, z-1/2'

\_cell\_length\_a 14.7517(12)  
 \_cell\_length\_b 11.2308(13)  
 \_cell\_length\_c 22.628(3)  
 \_cell\_angle\_alpha 90  
 \_cell\_angle\_beta 103.123(10)  
 \_cell\_angle\_gamma 90  
 \_cell\_volume 3651.0(7)  
 \_cell\_formula\_units\_Z 8  
 \_cell\_measurement\_temperature 296(2)  
 \_cell\_measurement\_reflns\_used 2790  
 \_cell\_measurement\_theta\_min 2.2900  
 \_cell\_measurement\_theta\_max 28.9880

\_exptl\_crystal\_description block  
 \_exptl\_crystal\_colour yellow  
 \_exptl\_crystal\_density\_meas ?

```

_exptl_crystal_density_method  ?
_exptl_crystal_density_diffn   1.805
_exptl_crystal_F_000           1936
_exptl_transmission_factor_min  ?
_exptl_transmission_factor_max  ?
_exptl_crystal_size_max         0.50
_exptl_crystal_size_mid         0.40
_exptl_crystal_size_min        0.40
_exptl_absorpt_coefficient_mu   2.174
_shelx_estimated_absorpt_T_min  ?
_shelx_estimated_absorpt_T_max  ?
_exptl_absorpt_correction_T_min 0.52595
_exptl_absorpt_correction_T_max 1.00000
_exptl_absorpt_correction_type  'multi-scan'
_exptl_absorpt_process_details
;
CrysAlisPro, Agilent Technologies,
Version 1.171.37.35h (release 09-02-2015 CrysAlis171 .NET)
(compiled Feb  9 2015,16:26:32)
Empirical absorption correction using spherical harmonics,
implemented in SCALE3 ABSPACK scaling algorithm.
;
_exptl_absorpt_special_details  ?
_diffn_ambient_temperature      296(2)
_diffn_radiation_wavelength     0.71073
_diffn_radiation_type           MoK\alpha
_diffn_source                   ?
_diffn_measurement_device_type  'KM4 CCD four-circle diffractometer'
_diffn_measurement_method       ?
_diffn_detector_area_resol_mean ?
_diffn_reflns_number            8148
_diffn_reflns_av_unetI/netI     0.0519
_diffn_reflns_av_R_equivalents  0.0419
_diffn_reflns_limit_h_min       -18
_diffn_reflns_limit_h_max       19
_diffn_reflns_limit_k_min       -14
_diffn_reflns_limit_k_max       14
_diffn_reflns_limit_l_min       -30
_diffn_reflns_limit_l_max       28
_diffn_reflns_theta_min         2.302
_diffn_reflns_theta_max         29.083
_diffn_reflns_theta_full        25.242
_diffn_measured_fraction_theta_max 0.845
_diffn_measured_fraction_theta_full 0.994
_diffn_reflns_Laue_measured_fraction_max 0.845
_diffn_reflns_Laue_measured_fraction_full 0.994
_diffn_reflns_point_group_measured_fraction_max 0.845
_diffn_reflns_point_group_measured_fraction_full 0.994
_reflns_number_total            4142
_reflns_number_gt               3086
_reflns_threshold_expression     'I > 2\sigma(I)'
_reflns_Friedel_coverage         0.000
_reflns_Friedel_fraction_max    .

```

```

_reflns_Friedel_fraction_full .

_reflns_special_details
;
Reflections were merged by SHELXL according to the crystal
class for the calculation of statistics and refinement.

_reflns_Friedel_fraction is defined as the number of unique
Friedel pairs measured divided by the number that would be
possible theoretically, ignoring centric projections and
systematic absences.
;

_computing_data_collection
;
CrysAlisPro, Agilent Technologies,
Version 1.171.37.35h (release 09-02-2015 CrysAlis171 .NET)
(compiled Feb 9 2015,16:26:32)
;
_computing_cell_refinement
;
CrysAlisPro, Agilent Technologies,
Version 1.171.37.35h (release 09-02-2015 CrysAlis171 .NET)
(compiled Feb 9 2015,16:26:32)
;
_computing_data_reduction
;
CrysAlisPro, Agilent Technologies,
Version 1.171.37.35h (release 09-02-2015 CrysAlis171 .NET)
(compiled Feb 9 2015,16:26:32)
;
_computing_structure_solution ?
_computing_structure_refinement 'SHELXL-2014/7 (Sheldrick, 2014)'
_computing_molecular_graphics ?
_computing_publication_material ?
_refine_special_details ?
_refine_ls_structure_factor_coef Fsqd
_refine_ls_matrix_type full
_refine_ls_weighting_scheme calc
_refine_ls_weighting_details
'w=1/[\s^2^(Fo^2^)+(0.0801P)^2^+0.0750P] where P=(Fo^2^+2Fc^2^)/3'
_atom_sites_solution_primary difmap
_atom_sites_solution_secondary difmap
_atom_sites_solution_hydrogens difmap
_refine_ls_hydrogen_treatment mixed
_refine_ls_extinction_method none
_refine_ls_extinction_coef .
_refine_ls_number_reflns 4142
_refine_ls_number_parameters 236
_refine_ls_number_restraints 0
_refine_ls_R_factor_all 0.0740
_refine_ls_R_factor_gt 0.0543
_refine_ls_wR_factor_ref 0.1562

```

\_refine\_ls\_wR\_factor\_gt 0.1341  
 \_refine\_ls\_goodness\_of\_fit\_ref 1.058  
 \_refine\_ls\_restrained\_S\_all 1.058  
 \_refine\_ls\_shift/su\_max 0.001  
 \_refine\_ls\_shift/su\_mean 0.000

loop\_

\_atom\_site\_label  
 \_atom\_site\_type\_symbol  
 \_atom\_site\_fract\_x  
 \_atom\_site\_fract\_y  
 \_atom\_site\_fract\_z  
 \_atom\_site\_U\_iso\_or\_equiv  
 \_atom\_site\_adp\_type  
 \_atom\_site\_occupancy  
 \_atom\_site\_site\_symmetry\_order  
 \_atom\_site\_calc\_flag  
 \_atom\_site\_refinement\_flags\_posn  
 \_atom\_site\_refinement\_flags\_adp  
 \_atom\_site\_refinement\_flags\_occupancy  
 \_atom\_site\_disorder\_assembly  
 \_atom\_site\_disorder\_group  
 C2 C 0.6621(2) 0.6234(4) 0.94301(15) 0.0397(9) Uani 1 1 d . . . . .  
 C21 C 0.6125(2) 0.7735(4) 0.86253(17) 0.0417(9) Uani 1 1 d . . . . .  
 C22 C 0.5988(3) 0.8934(5) 0.8656(2) 0.0595(12) Uani 1 1 d . . . . .  
 H22 H 0.5832 0.9265 0.8997 0.089 Uiso 1 1 calc R U . . .  
 C23 C 0.6084(4) 0.9667(5) 0.8168(3) 0.0687(14) Uani 1 1 d . . . . .  
 H23 H 0.5989 1.0483 0.8185 0.103 Uiso 1 1 calc R U . . .  
 C24 C 0.6312(3) 0.9188(5) 0.7679(2) 0.0551(12) Uani 1 1 d . . . . .  
 C25 C 0.6469(4) 0.7989(5) 0.7648(2) 0.0691(14) Uani 1 1 d . . . . .  
 H25 H 0.6639 0.7668 0.7310 0.104 Uiso 1 1 calc R U . . .  
 C26 C 0.6374(4) 0.7261(4) 0.8120(2) 0.0614(12) Uani 1 1 d . . . . .  
 H26 H 0.6477 0.6446 0.8099 0.092 Uiso 1 1 calc R U . . .  
 C33 C 1.0375(2) 0.2009(4) 1.10739(16) 0.0403(8) Uani 1 1 d . . . . .  
 H33 H 1.0939 0.2135 1.0966 0.060 Uiso 1 1 calc R U . . .  
 C34 C 1.0302(3) 0.1167(4) 1.15065(17) 0.0470(10) Uani 1 1 d . . . . .  
 C6 C 0.6480(2) 0.3933(4) 1.04844(15) 0.0392(9) Uani 1 1 d . . . . .  
 C8 C 0.7149(2) 0.3041(5) 1.08411(17) 0.0481(10) Uani 1 1 d . . . . .  
 H8A H 0.7226 0.3183 1.1273 0.072 Uiso 1 1 calc R U . . .  
 H8B H 0.6912 0.2240 1.0752 0.072 Uiso 1 1 calc R U . . .  
 C31 C 0.8744(2) 0.2474(4) 1.09669(16) 0.0389(9) Uani 1 1 d . . . . .  
 C32 C 0.9600(2) 0.2657(4) 1.08056(15) 0.0379(8) Uani 1 1 d . . . . .  
 C35 C 0.9477(3) 0.0976(5) 1.16741(19) 0.0525(11) Uani 1 1 d . . . . .  
 H35 H 0.9443 0.0415 1.1971 0.079 Uiso 1 1 calc R U . . .  
 C36 C 0.8697(3) 0.1621(4) 1.13993(17) 0.0486(10) Uani 1 1 d . . . . .  
 H36 H 0.8134 0.1479 1.1506 0.073 Uiso 1 1 calc R U . . .  
 N1 N 0.5985(2) 0.6977(4) 0.91000(15) 0.0507(9) Uani 1 1 d . . . . .  
 H1 H 0.546(4) 0.676(5) 0.916(2) 0.076 Uiso 1 1 d . U . . .  
 N4 N 0.6277(2) 0.5555(4) 0.98179(15) 0.0487(9) Uani 1 1 d . . . . .  
 H4 H 0.562(4) 0.554(5) 0.981(2) 0.073 Uiso 1 1 d . U . . .  
 N5 N 0.6837(2) 0.4714(4) 1.01724(16) 0.0462(9) Uani 1 1 d . . . . .  
 H5 H 0.738(4) 0.482(5) 1.010(2) 0.069 Uiso 1 1 d . U . . .  
 O7 O 0.56486(16) 0.3906(3) 1.04965(12) 0.0485(7) Uani 1 1 d . . . . .

O9 O 0.80247(16) 0.3170(3) 1.06739(12) 0.0504(7) Uani 1 1 d . . . . .  
 S3 S 0.77450(6) 0.61598(12) 0.94058(5) 0.0507(3) Uani 1 1 d . . . . .  
 Cl32 Cl 0.96720(7) 0.37241(10) 1.02692(5) 0.0534(3) Uani 1 1 d . . . . .  
 Cl34 Cl 1.12884(9) 0.03691(15) 1.18657(6) 0.0706(4) Uani 1 1 d . . . . .  
 I24A I 0.65332(16) 1.0147(3) 0.69073(10) 0.0620(7) Uani 0.54(2) 1 d . . P A 1  
 I24B I 0.6481(3) 1.0470(12) 0.7059(6) 0.107(2) Uani 0.46(2) 1 d . . P A 2

loop\_

\_atom\_site\_aniso\_label  
 \_atom\_site\_aniso\_U\_11  
 \_atom\_site\_aniso\_U\_22  
 \_atom\_site\_aniso\_U\_33  
 \_atom\_site\_aniso\_U\_23  
 \_atom\_site\_aniso\_U\_13  
 \_atom\_site\_aniso\_U\_12  
 C2 0.0311(16) 0.052(3) 0.0400(17) 0.0043(16) 0.0165(14) -0.0010(17)  
 C21 0.0326(17) 0.048(2) 0.0478(19) 0.0110(18) 0.0161(15) 0.0063(18)  
 C22 0.063(3) 0.056(3) 0.061(3) -0.007(2) 0.018(2) 0.010(3)  
 C23 0.068(3) 0.044(3) 0.093(4) 0.017(3) 0.015(3) 0.009(3)  
 C24 0.0364(19) 0.061(3) 0.067(3) 0.028(2) 0.0106(19) 0.002(2)  
 C25 0.085(3) 0.074(4) 0.061(3) 0.011(3) 0.042(2) 0.004(3)  
 C26 0.083(3) 0.044(3) 0.070(3) 0.008(2) 0.045(2) 0.003(3)  
 C33 0.0260(15) 0.045(2) 0.0508(19) -0.0036(17) 0.0106(14) 0.0012(16)  
 C34 0.0341(17) 0.054(3) 0.049(2) -0.0020(19) 0.0019(16) 0.0049(19)  
 C6 0.0274(15) 0.053(3) 0.0398(17) 0.0036(16) 0.0129(13) 0.0024(17)  
 C8 0.0263(16) 0.066(3) 0.055(2) 0.017(2) 0.0166(15) 0.0074(19)  
 C31 0.0261(16) 0.047(2) 0.0439(18) 0.0007(16) 0.0072(14) 0.0014(16)  
 C32 0.0338(16) 0.039(2) 0.0426(18) -0.0025(15) 0.0131(14) -0.0030(17)  
 C35 0.042(2) 0.056(3) 0.057(2) 0.013(2) 0.0050(18) -0.004(2)  
 C36 0.0312(17) 0.062(3) 0.055(2) 0.009(2) 0.0132(16) -0.0036(19)  
 N1 0.0346(15) 0.066(3) 0.0594(19) 0.0197(18) 0.0265(15) 0.0102(18)  
 N4 0.0278(14) 0.067(3) 0.0547(19) 0.0217(18) 0.0162(14) 0.0078(17)  
 N5 0.0252(14) 0.061(3) 0.0547(18) 0.0186(17) 0.0144(14) 0.0041(16)  
 O7 0.0269(12) 0.065(2) 0.0573(15) 0.0161(14) 0.0169(11) 0.0034(13)  
 O9 0.0292(12) 0.065(2) 0.0614(16) 0.0226(15) 0.0200(11) 0.0099(14)  
 S3 0.0295(4) 0.0693(8) 0.0588(6) 0.0114(5) 0.0219(4) 0.0012(5)  
 Cl32 0.0468(5) 0.0518(7) 0.0685(6) 0.0147(5) 0.0275(5) 0.0005(5)  
 Cl34 0.0473(6) 0.0875(11) 0.0718(7) 0.0112(7) 0.0027(5) 0.0246(7)  
 I24A 0.0491(6) 0.0737(9) 0.0659(11) 0.0328(8) 0.0188(4) 0.0093(6)  
 I24B 0.0662(10) 0.118(4) 0.129(3) 0.087(3) 0.0068(14) -0.0113(14)

\_geom\_special\_details

;

All esds (except the esd in the dihedral angle between two l.s. planes) are estimated using the full covariance matrix. The cell esds are taken into account individually in the estimation of esds in distances, angles and torsion angles; correlations between esds in cell parameters are only used when they are defined by crystal symmetry. An approximate (isotropic) treatment of cell esds is used for estimating esds involving l.s. planes.

;

loop\_

\_geom\_bond\_atom\_site\_label\_1



\_geom\_bond\_atom\_site\_label\_2  
 \_geom\_bond\_distance  
 \_geom\_bond\_site\_symmetry\_2  
 \_geom\_bond\_publ\_flag  
 C2 N4 1.346(5) . ?  
 C2 N1 1.347(5) . ?  
 C2 S3 1.674(3) . ?  
 C21 C22 1.366(6) . ?  
 C21 C26 1.384(6) . ?  
 C21 N1 1.423(5) . ?  
 C22 C23 1.410(7) . ?  
 C22 H22 0.9300 . ?  
 C23 C24 1.340(8) . ?  
 C23 H23 0.9300 . ?  
 C24 C25 1.370(8) . ?  
 C24 I24B 2.065(5) . ?  
 C24 I24A 2.139(5) . ?  
 C25 C26 1.376(6) . ?  
 C25 H25 0.9300 . ?  
 C26 H26 0.9300 . ?  
 C33 C32 1.375(5) . ?  
 C33 C34 1.383(6) . ?  
 C33 H33 0.9300 . ?  
 C34 C35 1.372(6) . ?  
 C34 Cl34 1.745(4) . ?  
 C6 O7 1.234(4) . ?  
 C6 N5 1.309(5) . ?  
 C6 C8 1.506(5) . ?  
 C8 O9 1.433(4) . ?  
 C8 H8A 0.9700 . ?  
 C8 H8B 0.9700 . ?  
 C31 O9 1.363(4) . ?  
 C31 C36 1.383(6) . ?  
 C31 C32 1.406(5) . ?  
 C32 Cl32 1.726(4) . ?  
 C35 C36 1.383(6) . ?  
 C35 H35 0.9300 . ?  
 C36 H36 0.9300 . ?  
 N1 H1 0.85(6) . ?  
 N4 N5 1.385(5) . ?  
 N4 H4 0.97(6) . ?  
 N5 H5 0.85(6) . ?

loop\_  
 \_geom\_angle\_atom\_site\_label\_1  
 \_geom\_angle\_atom\_site\_label\_2  
 \_geom\_angle\_atom\_site\_label\_3  
 \_geom\_angle  
 \_geom\_angle\_site\_symmetry\_1  
 \_geom\_angle\_site\_symmetry\_3  
 \_geom\_angle\_publ\_flag  
 N4 C2 N1 113.3(3) . . ?  
 N4 C2 S3 121.1(3) . . ?

N1 C2 S3 125.6(3) . . ?  
 C22 C21 C26 119.5(4) . . ?  
 C22 C21 N1 120.2(4) . . ?  
 C26 C21 N1 120.3(4) . . ?  
 C21 C22 C23 119.5(4) . . ?  
 C21 C22 H22 120.3 . . ?  
 C23 C22 H22 120.3 . . ?  
 C24 C23 C22 120.1(5) . . ?  
 C24 C23 H23 120.0 . . ?  
 C22 C23 H23 120.0 . . ?  
 C23 C24 C25 120.9(4) . . ?  
 C23 C24 I24B 111.9(7) . . ?  
 C25 C24 I24B 127.1(7) . . ?  
 C23 C24 I24A 125.8(4) . . ?  
 C25 C24 I24A 113.3(4) . . ?  
 C24 C25 C26 119.8(5) . . ?  
 C24 C25 H25 120.1 . . ?  
 C26 C25 H25 120.1 . . ?  
 C25 C26 C21 120.3(5) . . ?  
 C25 C26 H26 119.9 . . ?  
 C21 C26 H26 119.9 . . ?  
 C32 C33 C34 119.0(3) . . ?  
 C32 C33 H33 120.5 . . ?  
 C34 C33 H33 120.5 . . ?  
 C35 C34 C33 121.3(4) . . ?  
 C35 C34 Cl34 119.3(3) . . ?  
 C33 C34 Cl34 119.4(3) . . ?  
 O7 C6 N5 123.5(4) . . ?  
 O7 C6 C8 120.4(3) . . ?  
 N5 C6 C8 116.1(3) . . ?  
 O9 C8 C6 108.2(3) . . ?  
 O9 C8 H8A 110.1 . . ?  
 C6 C8 H8A 110.1 . . ?  
 O9 C8 H8B 110.1 . . ?  
 C6 C8 H8B 110.1 . . ?  
 H8A C8 H8B 108.4 . . ?  
 O9 C31 C36 125.6(3) . . ?  
 O9 C31 C32 115.8(3) . . ?  
 C36 C31 C32 118.5(3) . . ?  
 C33 C32 C31 120.9(3) . . ?  
 C33 C32 Cl32 120.0(3) . . ?  
 C31 C32 Cl32 119.1(3) . . ?  
 C34 C35 C36 119.6(4) . . ?  
 C34 C35 H35 120.2 . . ?  
 C36 C35 H35 120.2 . . ?  
 C35 C36 C31 120.7(4) . . ?  
 C35 C36 H36 119.7 . . ?  
 C31 C36 H36 119.7 . . ?  
 C2 N1 C21 126.0(3) . . ?  
 C2 N1 H1 107(4) . . ?  
 C21 N1 H1 125(3) . . ?  
 C2 N4 N5 120.0(3) . . ?  
 C2 N4 H4 121(3) . . ?

N5 N4 H4 118(3) . . ?  
 C6 N5 N4 120.6(3) . . ?  
 C6 N5 H5 134(4) . . ?  
 N4 N5 H5 105(4) . . ?  
 C31 O9 C8 117.6(3) . . ?

loop\_

\_geom\_torsion\_atom\_site\_label\_1  
 \_geom\_torsion\_atom\_site\_label\_2  
 \_geom\_torsion\_atom\_site\_label\_3  
 \_geom\_torsion\_atom\_site\_label\_4  
 \_geom\_torsion  
 \_geom\_torsion\_site\_symmetry\_1  
 \_geom\_torsion\_site\_symmetry\_2  
 \_geom\_torsion\_site\_symmetry\_3  
 \_geom\_torsion\_site\_symmetry\_4  
 \_geom\_torsion\_publ\_flag  
 C26 C21 C22 C23 1.2(7) . . . . ?  
 N1 C21 C22 C23 -176.8(4) . . . . ?  
 C21 C22 C23 C24 -0.3(8) . . . . ?  
 C22 C23 C24 C25 -1.0(8) . . . . ?  
 C22 C23 C24 I24B -176.6(4) . . . . ?  
 C22 C23 C24 I24A -177.9(4) . . . . ?  
 C23 C24 C25 C26 1.3(8) . . . . ?  
 I24B C24 C25 C26 176.2(4) . . . . ?  
 I24A C24 C25 C26 178.6(4) . . . . ?  
 C24 C25 C26 C21 -0.3(8) . . . . ?  
 C22 C21 C26 C25 -0.9(7) . . . . ?  
 N1 C21 C26 C25 177.1(4) . . . . ?  
 C32 C33 C34 C35 -0.5(6) . . . . ?  
 C32 C33 C34 Cl34 -178.2(3) . . . . ?  
 O7 C6 C8 O9 171.6(4) . . . . ?  
 N5 C6 C8 O9 -8.5(5) . . . . ?  
 C34 C33 C32 C31 0.2(6) . . . . ?  
 C34 C33 C32 Cl32 179.4(3) . . . . ?  
 O9 C31 C32 C33 179.7(3) . . . . ?  
 C36 C31 C32 C33 -0.4(6) . . . . ?  
 O9 C31 C32 Cl32 0.4(5) . . . . ?  
 C36 C31 C32 Cl32 -179.7(3) . . . . ?  
 C33 C34 C35 C36 1.1(7) . . . . ?  
 Cl34 C34 C35 C36 178.8(4) . . . . ?  
 C34 C35 C36 C31 -1.4(7) . . . . ?  
 O9 C31 C36 C35 -179.1(4) . . . . ?  
 C32 C31 C36 C35 1.1(6) . . . . ?  
 N4 C2 N1 C21 -175.2(4) . . . . ?  
 S3 C2 N1 C21 7.5(7) . . . . ?  
 C22 C21 N1 C2 -122.9(5) . . . . ?  
 C26 C21 N1 C2 59.2(6) . . . . ?  
 N1 C2 N4 N5 177.6(4) . . . . ?  
 S3 C2 N4 N5 -5.0(6) . . . . ?  
 O7 C6 N5 N4 -1.6(6) . . . . ?  
 C8 C6 N5 N4 178.5(4) . . . . ?  
 C2 N4 N5 C6 -170.0(4) . . . . ?

C36 C31 O9 C8 2.3(6) . . . . ?  
 C32 C31 O9 C8 -177.8(4) . . . . ?  
 C6 C8 O9 C31 177.2(3) . . . . ?

\_refine\_diff\_density\_max 0.892  
 \_refine\_diff\_density\_min -0.852  
 \_refine\_diff\_density\_rms 0.125

\_shelx\_res\_file  
 ;

shelx.res created by SHELXL-2014/7

TITL PK7\_20190409 in C2/c  
 CELL 0.71073 14.7517 11.2308 22.6284 90.000 103.123 90.000  
 ZERR 8.00 0.0012 0.0013 0.0026 0.000 0.010 0.000  
 LATT 7  
 SYMM - X, Y, 1/2 - Z  
 SFAC C H N O S CL I  
 UNIT 120 96 24 16 8 16 8  
 MERG 2  
 FMAP 2  
 ACTA  
 OMIT -4 4 2  
 OMIT 0 0 2  
 OMIT -3 7 3  
 OMIT -7 3 4  
 OMIT -7 3 5  
 OMIT -13 1 7  
 OMIT -9 5 7  
 OMIT -5 11 14  
 OMIT -5 1 3  
 BOND \$H  
 CONF  
 L.S. 50  
 WGHT 0.080100 0.075000  
 FVAR 1.07902 0.54061  
 C2 1 0.662060 0.623362 0.943008 11.00000 0.03114 0.05200 =  
 0.04000 0.00430 0.01648 -0.00098  
 C21 1 0.612539 0.773506 0.862525 11.00000 0.03256 0.04805 =  
 0.04783 0.01104 0.01607 0.00629  
 C22 1 0.598771 0.893409 0.865623 11.00000 0.06266 0.05628 =  
 0.06138 -0.00675 0.01796 0.00952  
 AFIX 43  
 H22 2 0.583183 0.926477 0.899673 11.00000 -1.50000  
 AFIX 0  
 C23 1 0.608377 0.966682 0.816790 11.00000 0.06808 0.04361 =  
 0.09282 0.01727 0.01490 0.00861  
 AFIX 43  
 H23 2 0.598864 1.048346 0.818524 11.00000 -1.50000  
 AFIX 0  
 C24 1 0.631199 0.918766 0.767886 11.00000 0.03640 0.06110 =

0.06718 0.02762 0.01063 0.00182  
 C25 1 0.646878 0.798884 0.764836 11.00000 0.08475 0.07353 =  
 0.06123 0.01148 0.04180 0.00405  
 AFIX 43  
 H25 2 0.663878 0.766844 0.731024 11.00000 -1.50000  
 AFIX 0  
 C26 1 0.637382 0.726058 0.811982 11.00000 0.08282 0.04438 =  
 0.07015 0.00791 0.04461 0.00296  
 AFIX 43  
 H26 2 0.647698 0.644636 0.809876 11.00000 -1.50000  
 AFIX 0  
 C33 1 1.037471 0.200928 1.107388 11.00000 0.02595 0.04506 =  
 0.05080 -0.00357 0.01058 0.00123  
 AFIX 43  
 H33 2 1.093906 0.213550 1.096607 11.00000 -1.50000  
 AFIX 0  
 C34 1 1.030222 0.116716 1.150647 11.00000 0.03405 0.05419 =  
 0.04912 -0.00196 0.00195 0.00486  
  
 C6 1 0.648026 0.393323 1.048439 11.00000 0.02740 0.05282 =  
 0.03983 0.00357 0.01294 0.00241  
 C8 1 0.714927 0.304137 1.084113 11.00000 0.02633 0.06627 =  
 0.05516 0.01659 0.01656 0.00736  
 AFIX 23  
 H8A 2 0.722588 0.318267 1.127255 11.00000 -1.50000  
 H8B 2 0.691159 0.224040 1.075165 11.00000 -1.50000  
 AFIX 0  
 C31 1 0.874410 0.247419 1.096687 11.00000 0.02607 0.04651 =  
 0.04389 0.00074 0.00716 0.00137  
 C32 1 0.959964 0.265721 1.080555 11.00000 0.03375 0.03935 =  
 0.04264 -0.00246 0.01309 -0.00299  
 C35 1 0.947716 0.097554 1.167408 11.00000 0.04234 0.05560 =  
 0.05659 0.01335 0.00503 -0.00360  
 AFIX 43  
 H35 2 0.944290 0.041512 1.197080 11.00000 -1.50000  
 AFIX 0  
 C36 1 0.869657 0.162053 1.139931 11.00000 0.03115 0.06191 =  
 0.05450 0.00929 0.01321 -0.00359  
 AFIX 43  
 H36 2 0.813371 0.147878 1.150642 11.00000 -1.50000  
 AFIX 0  
 N1 3 0.598525 0.697653 0.910002 11.00000 0.03462 0.06561 =  
 0.05945 0.01972 0.02650 0.01017  
 H1 2 0.545961 0.676254 0.915677 11.00000 -1.50000  
 N4 3 0.627686 0.555476 0.981785 11.00000 0.02784 0.06674 =  
 0.05474 0.02170 0.01617 0.00782  
 H4 2 0.561529 0.554244 0.980802 11.00000 -1.50000  
 N5 3 0.683717 0.471382 1.017240 11.00000 0.02520 0.06130 =  
 0.05470 0.01862 0.01444 0.00414  
 H5 2 0.737623 0.481736 1.010440 11.00000 -1.50000  
 O7 4 0.564861 0.390592 1.049646 11.00000 0.02694 0.06462 =  
 0.05735 0.01610 0.01691 0.00343  
 O9 4 0.802474 0.317010 1.067393 11.00000 0.02918 0.06529 =

```

0.06141 0.02263 0.01996 0.00992
S3 5 0.774498 0.615979 0.940579 11.00000 0.02954 0.06934 =
0.05884 0.01143 0.02189 0.00119
CL32 6 0.967203 0.372407 1.026916 11.00000 0.04681 0.05184 =
0.06853 0.01467 0.02746 0.00054
CL34 6 1.128839 0.036913 1.186565 11.00000 0.04729 0.08753 =
0.07183 0.01119 0.00268 0.02462
PART 1 21
I24A 7 0.653325 1.014738 0.690730 21.00000 0.04908 0.07367 =
0.06595 0.03282 0.01878 0.00934
PART 0
PART 2 -21
I24B 7 0.648128 1.047033 0.705873 -21.00000 0.06624 0.11809 =
0.12936 0.08726 0.00682 -0.01126
PART 0
HKLF 4

```

REM PK7\_20190409 in C2/c

REM R1 = 0.0543 for 3086 Fo > 4sig(Fo) and 0.0740 for all 4142 data

REM 236 parameters refined using 0 restraints

END

WGHT 0.0801 0.0750

REM Highest difference peak 0.892, deepest hole -0.852, 1-sigma level 0.125

```

Q1 1 0.7077 1.0049 0.7392 11.00000 0.05 0.89
Q2 1 0.5975 1.0386 0.6498 11.00000 0.05 0.85
Q3 1 0.6129 1.0912 0.6725 11.00000 0.05 0.82
Q4 1 0.6972 0.9570 0.7233 11.00000 0.05 0.82
Q5 1 0.6046 0.9586 0.6682 11.00000 0.05 0.63
Q6 1 0.6928 1.1174 0.7371 11.00000 0.05 0.56
Q7 1 0.7311 1.0371 0.8292 11.00000 0.05 0.51
Q8 1 0.7379 0.6888 0.9218 11.00000 0.05 0.51
Q9 1 0.7125 1.0276 0.7996 11.00000 0.05 0.48
Q10 1 0.5823 1.0379 0.6006 11.00000 0.05 0.47
Q11 1 0.9974 0.2966 1.0444 11.00000 0.05 0.46
Q12 1 0.9356 0.2847 1.0088 11.00000 0.05 0.45
Q13 1 0.7626 0.4312 1.1432 11.00000 0.05 0.45
Q14 1 1.0829 0.1089 1.1656 11.00000 0.05 0.43
Q15 1 0.9856 0.4741 1.0370 11.00000 0.05 0.41
Q16 1 0.7755 0.7239 0.9377 11.00000 0.05 0.40
Q17 1 0.5524 1.0199 0.6920 11.00000 0.05 0.39
Q18 1 1.0852 -0.0088 1.1768 11.00000 0.05 0.37
Q19 1 1.0382 0.1837 1.1441 11.00000 0.05 0.37
Q20 1 0.7460 0.5369 0.9288 11.00000 0.05 0.37

```

;

# <sup>1</sup>H NMR for compound PK1

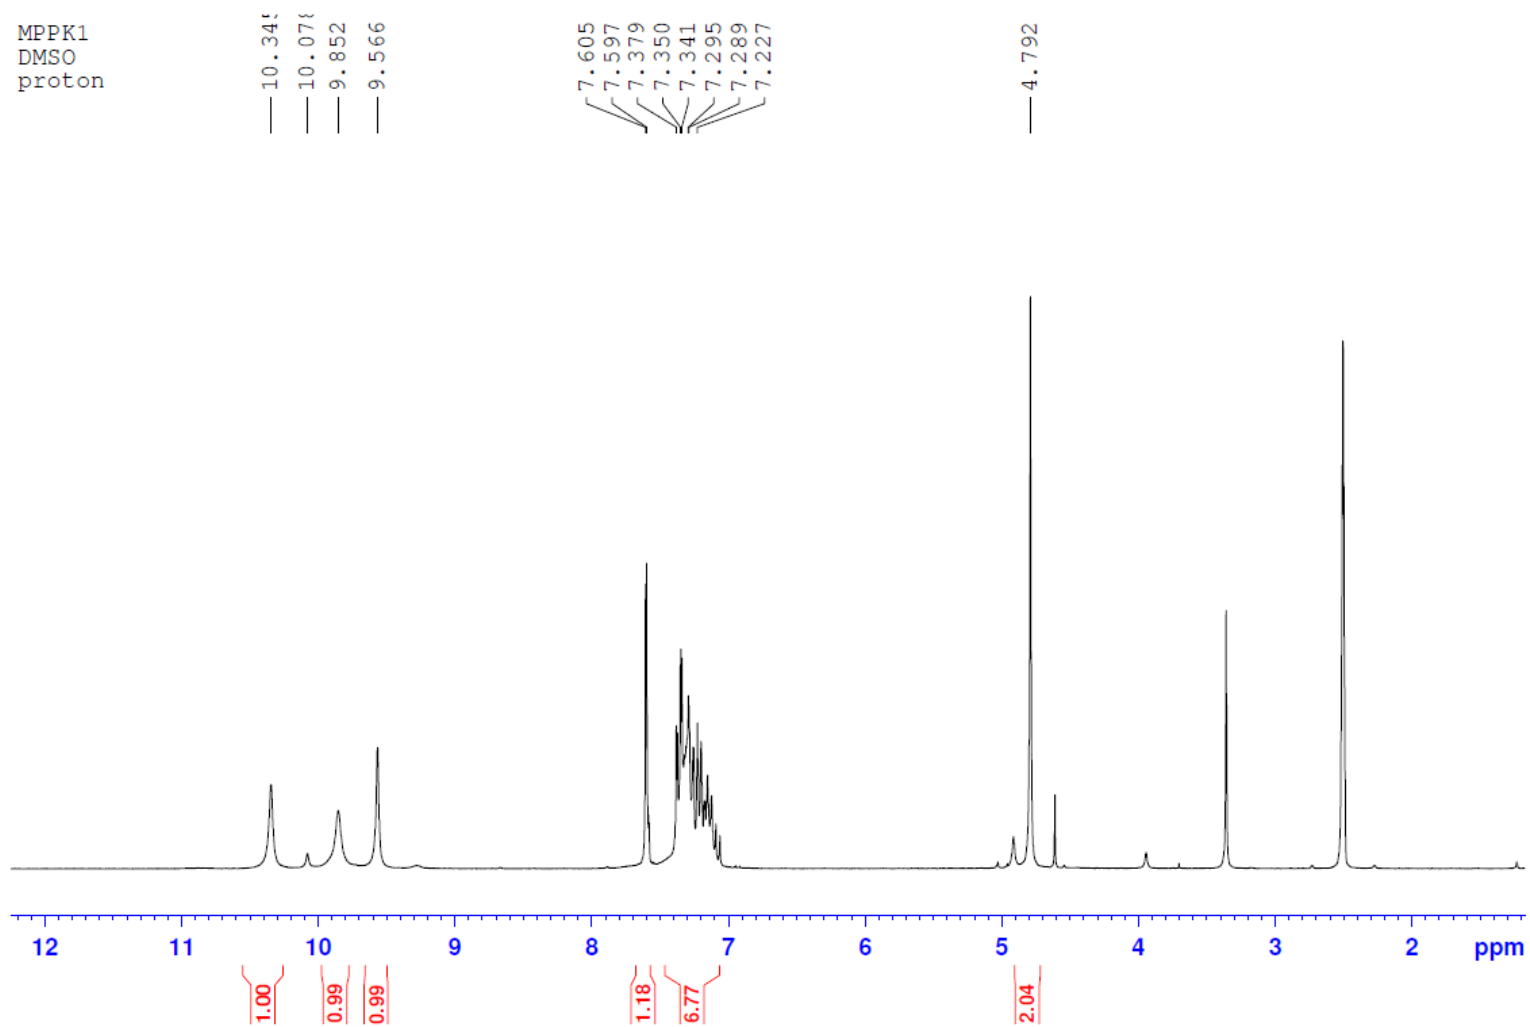

<sup>1</sup>H NMR for compound PK2

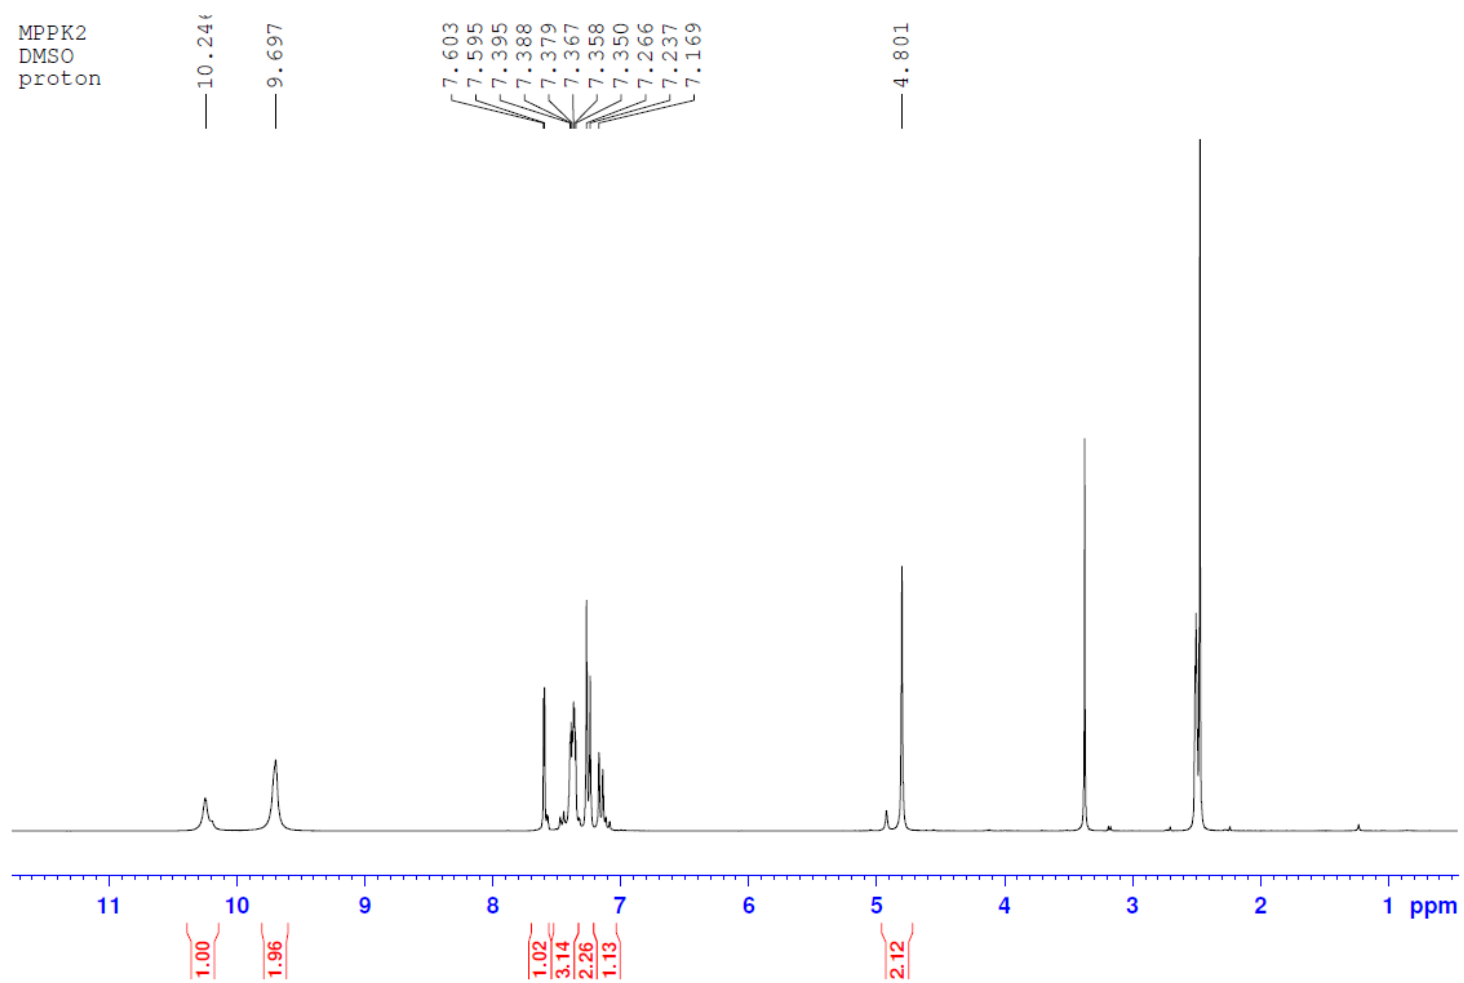



# <sup>1</sup>H NMR for compound PK3

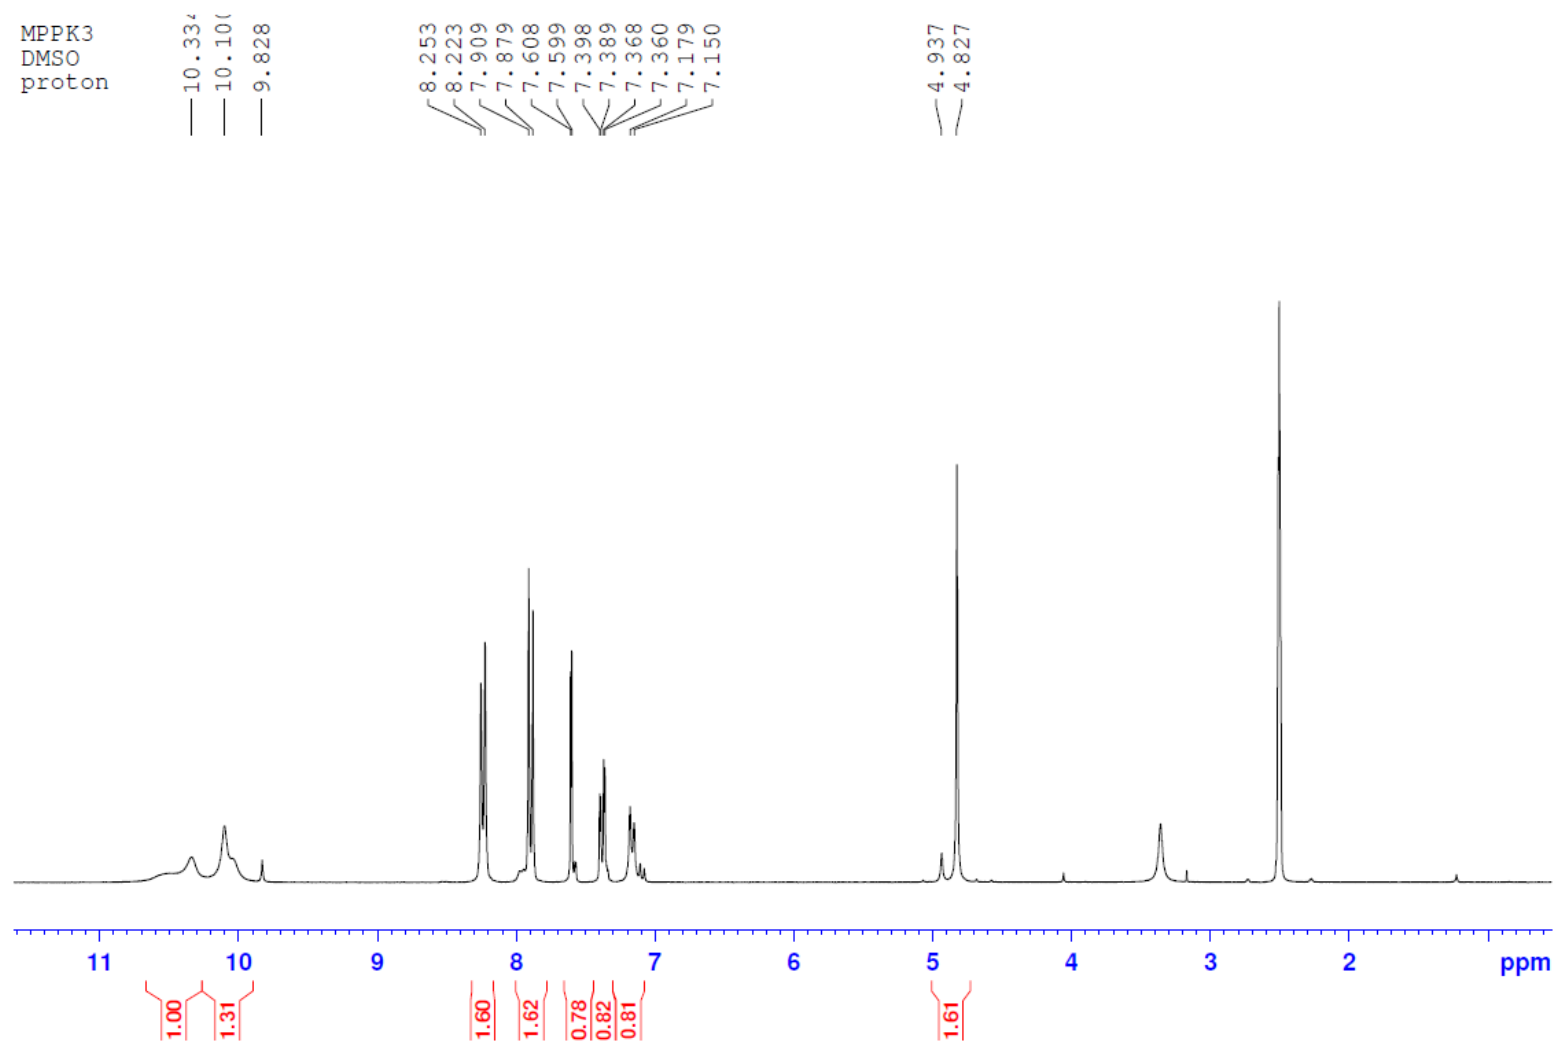

<sup>1</sup>H NMR for compound PK4

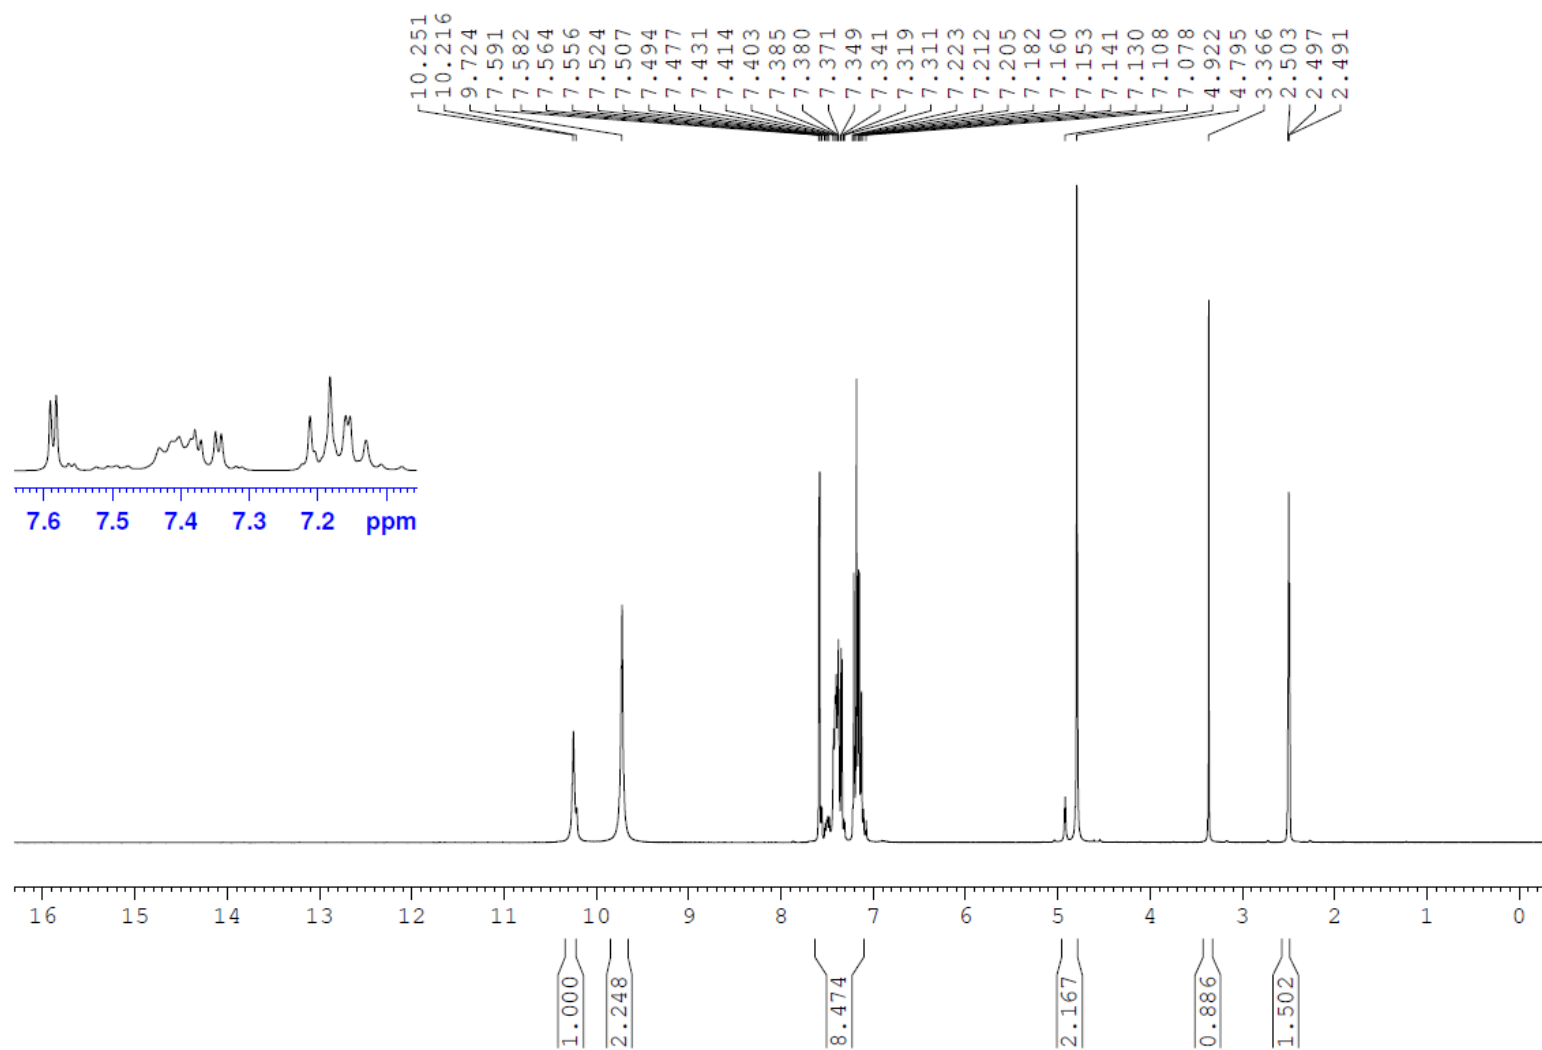

<sup>1</sup>H NMR for compound PK5

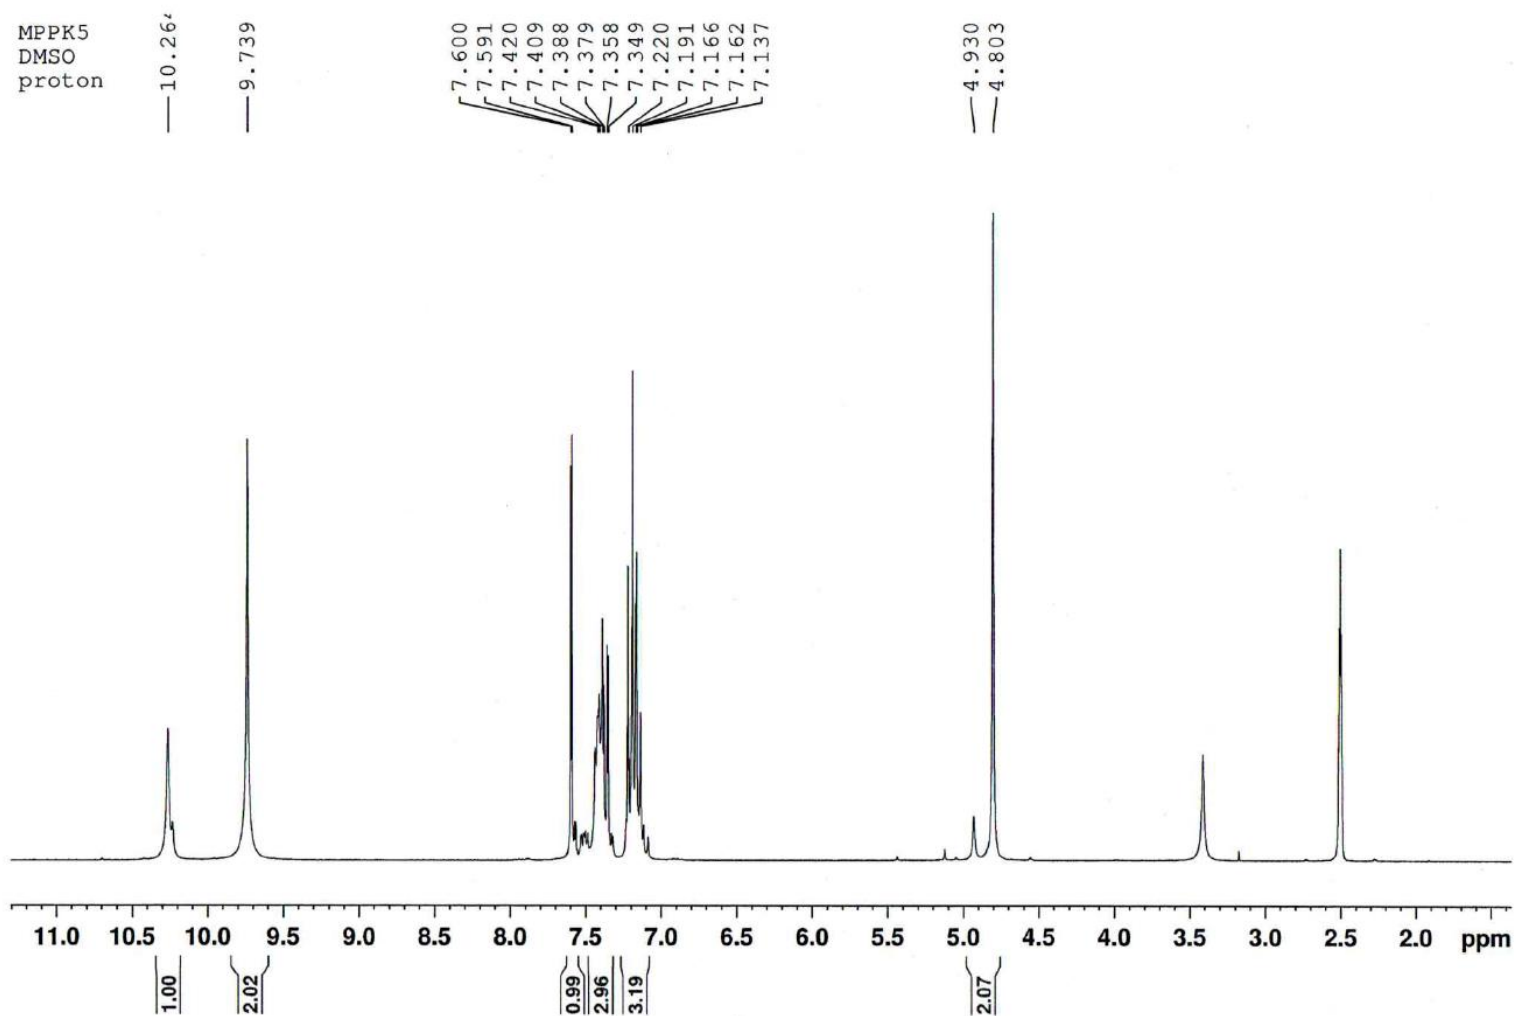

<sup>1</sup>H NMR for compound PK6

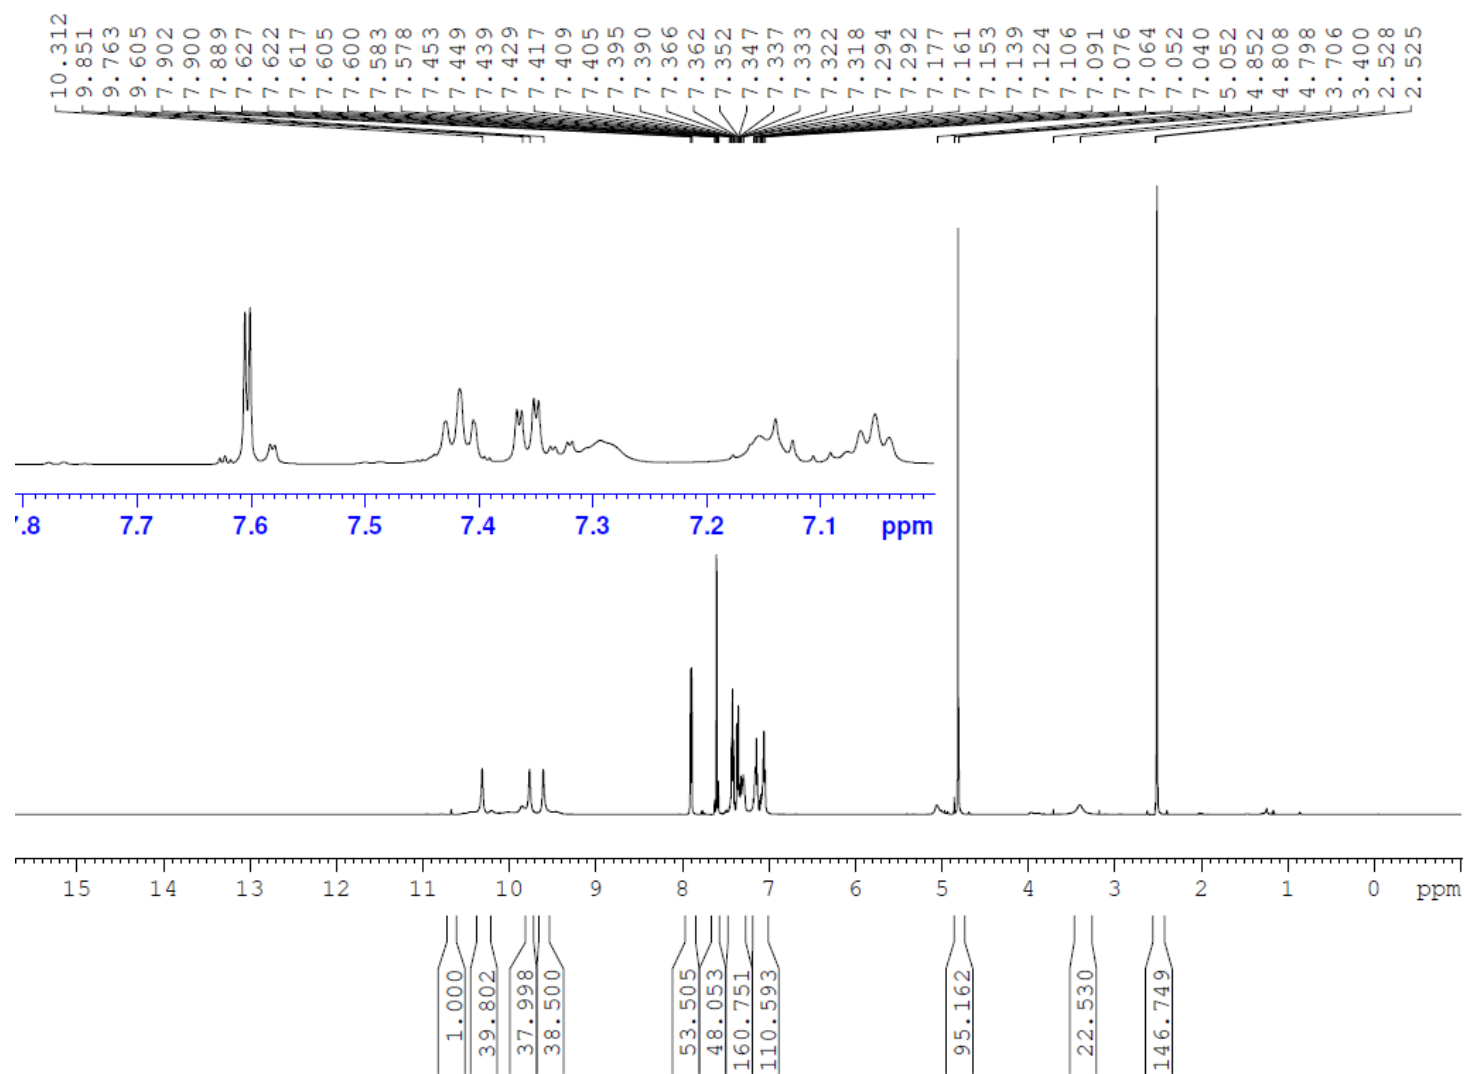

<sup>1</sup>H NMR for compound PK7

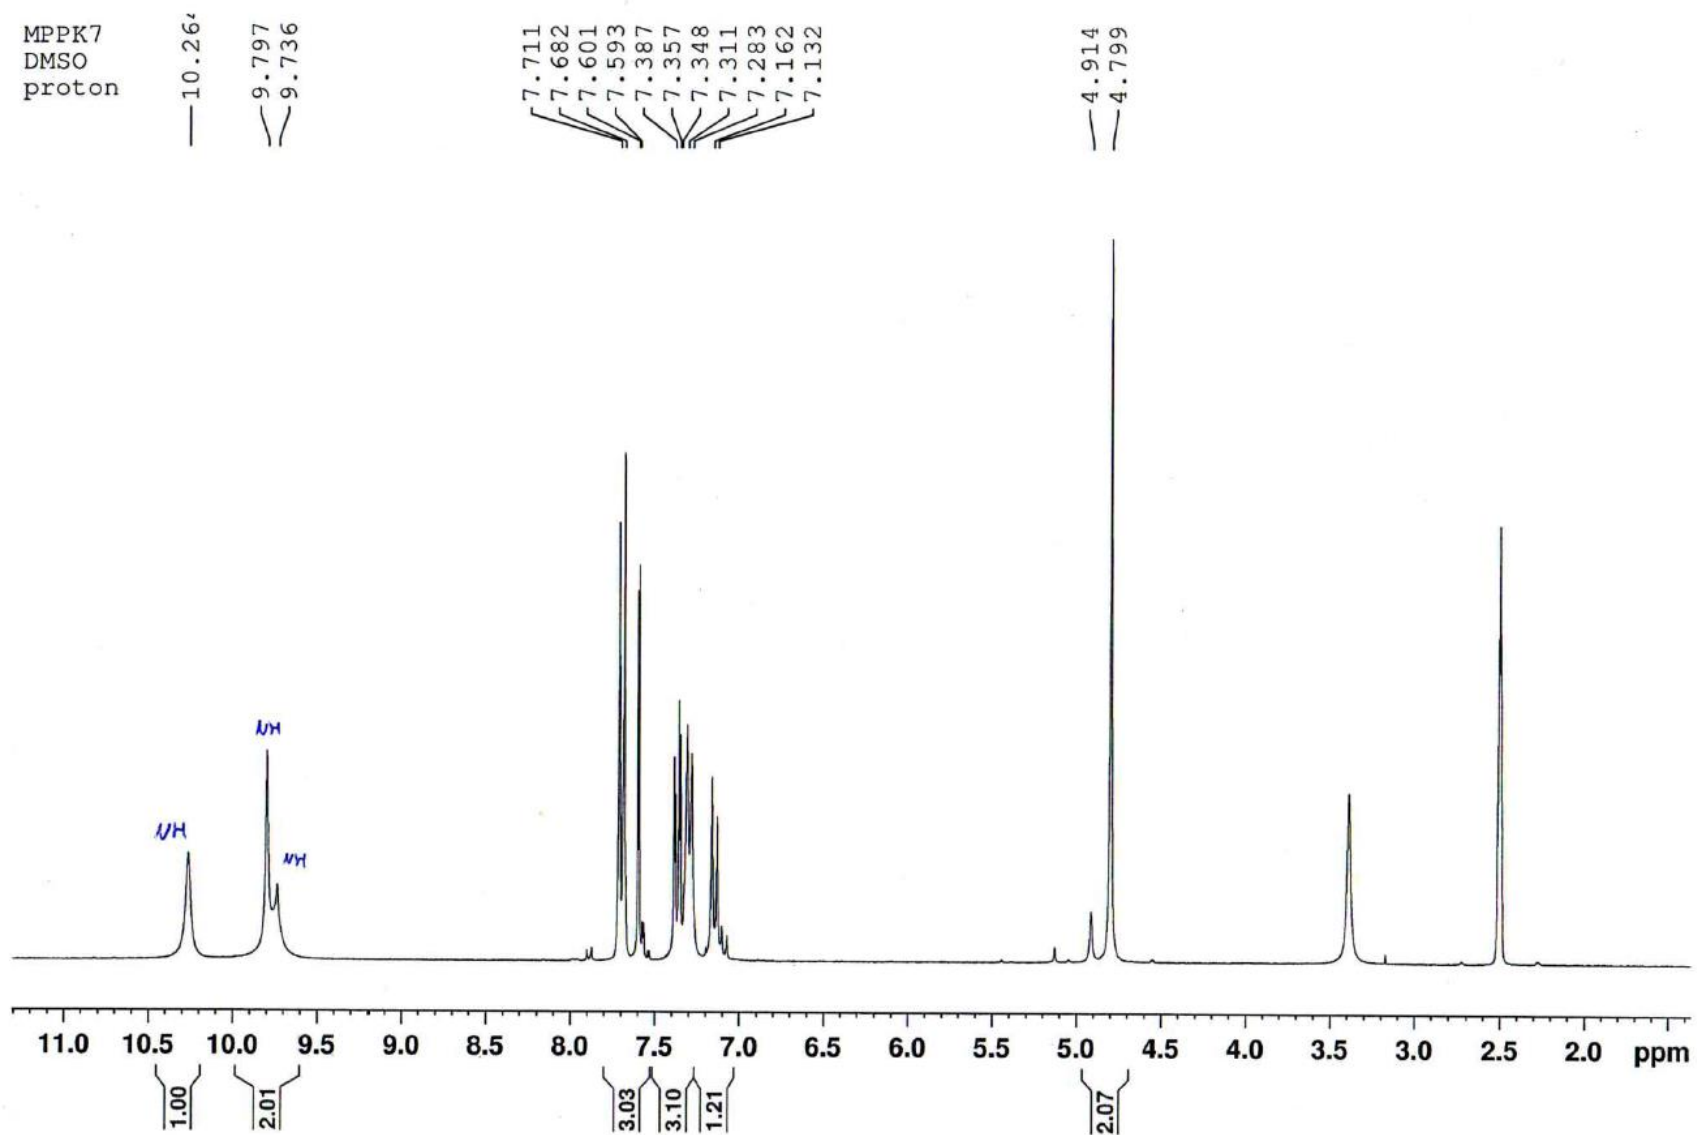

<sup>1</sup>H NMR for compound PK8

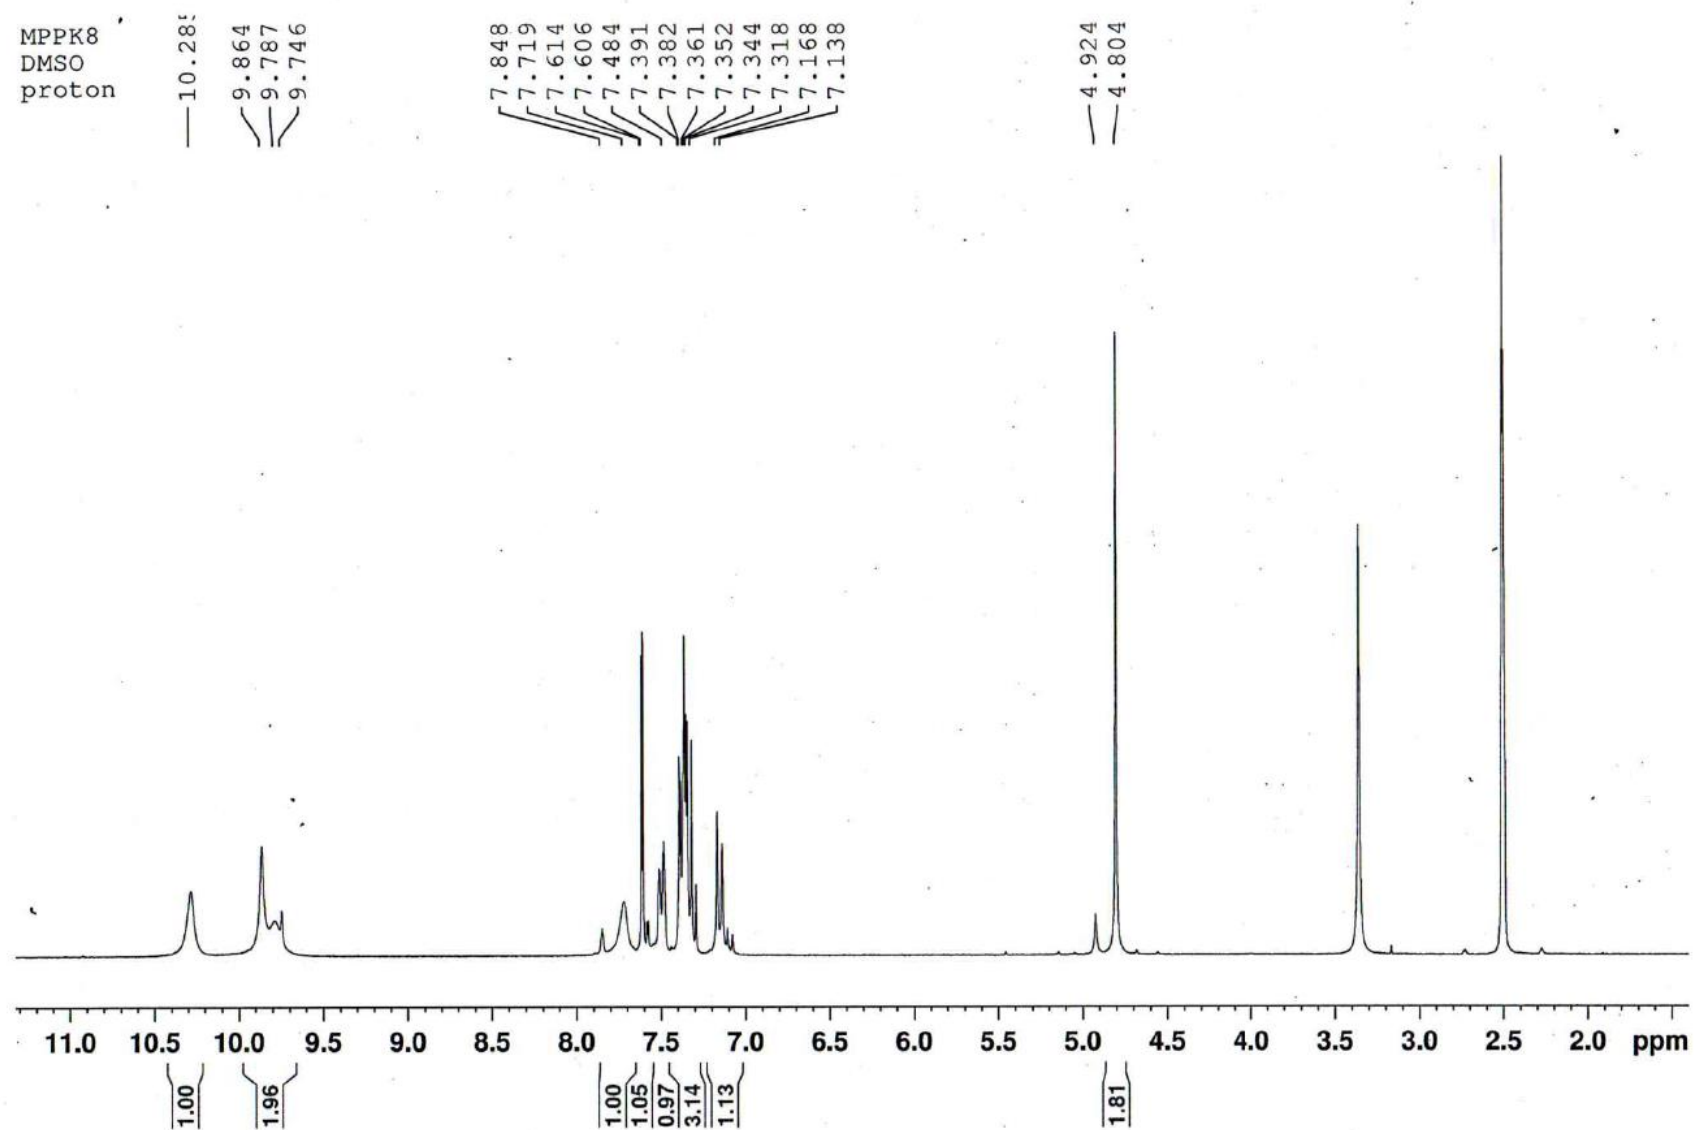

<sup>1</sup>H NMR for compound PK10

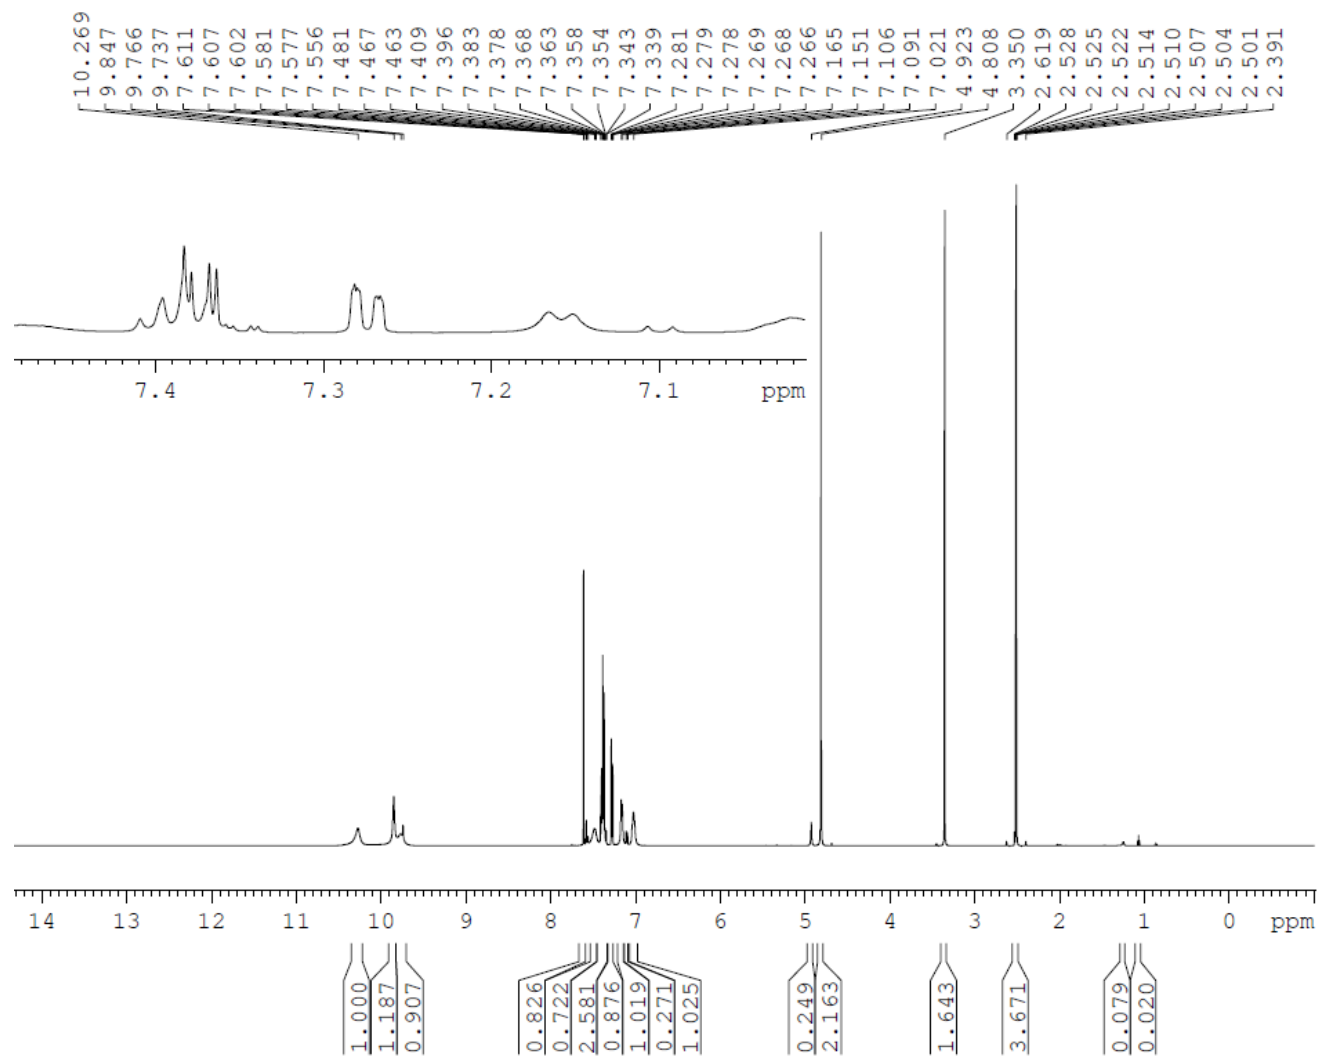

**<sup>1</sup>H NMR for compound PK11**

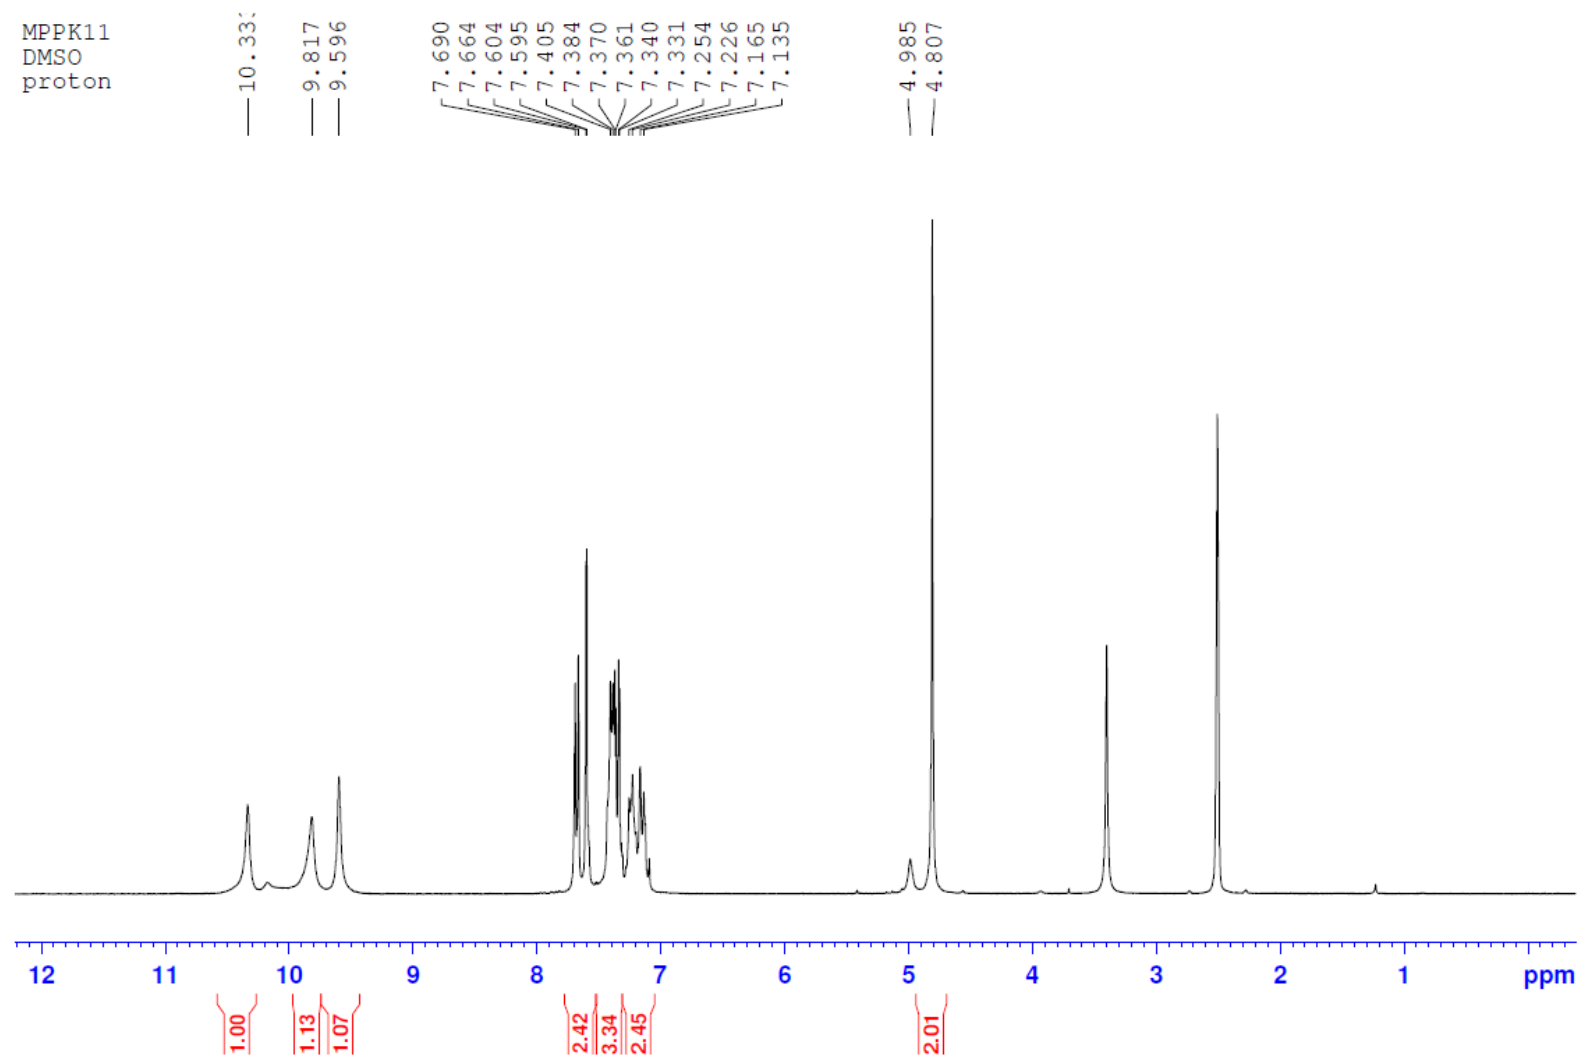



<sup>1</sup>H NMR for compound PK12

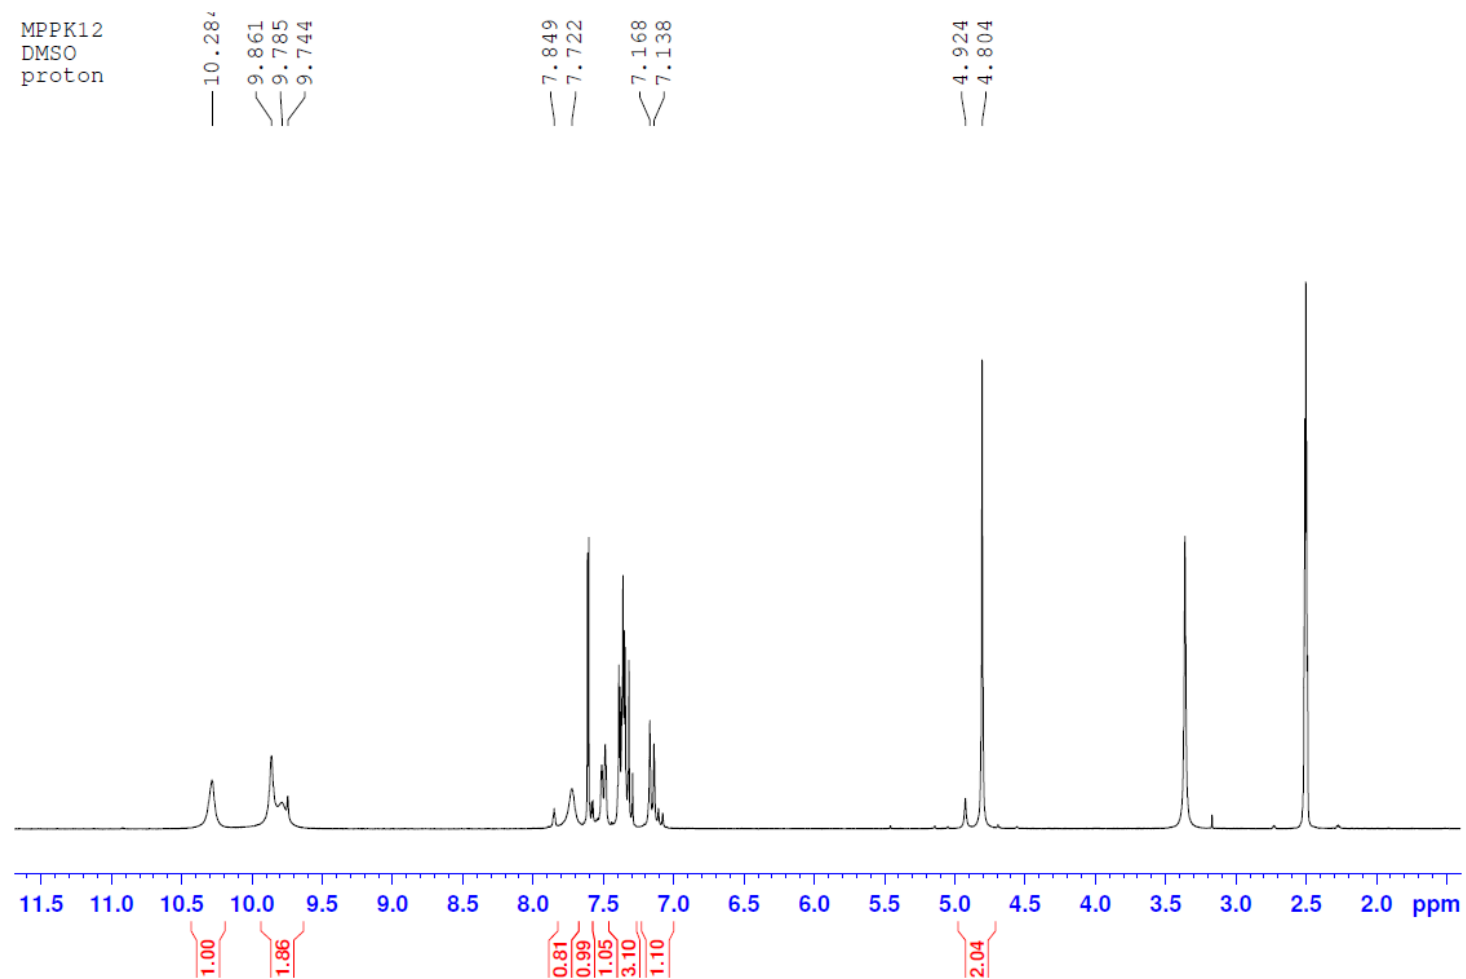

## MS spectra

### PK1

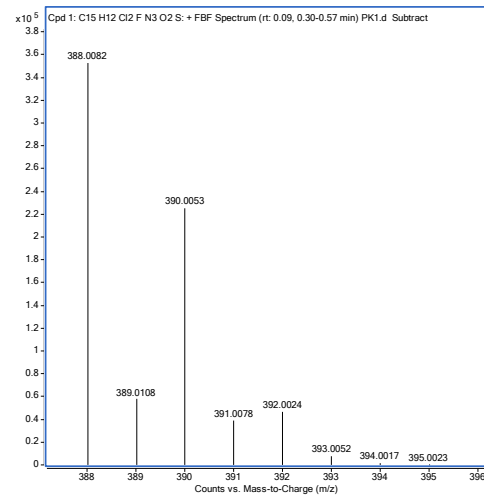

### PK2

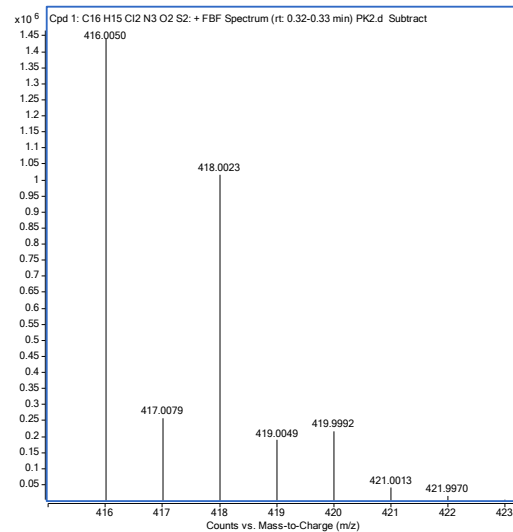

### PK3

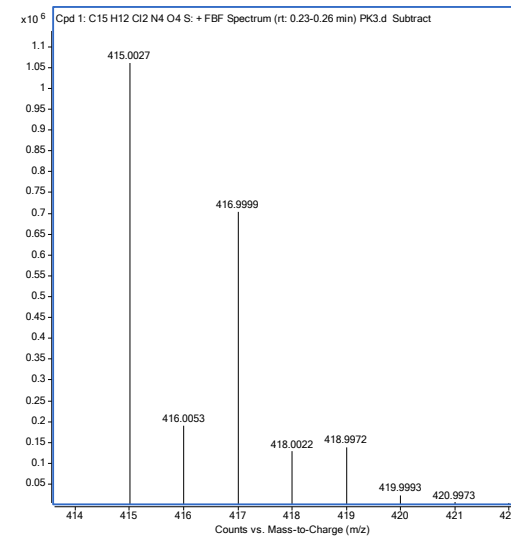

## PK4

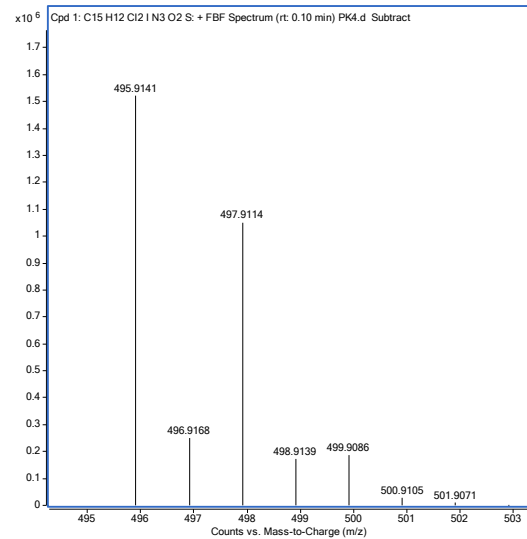

## PK7

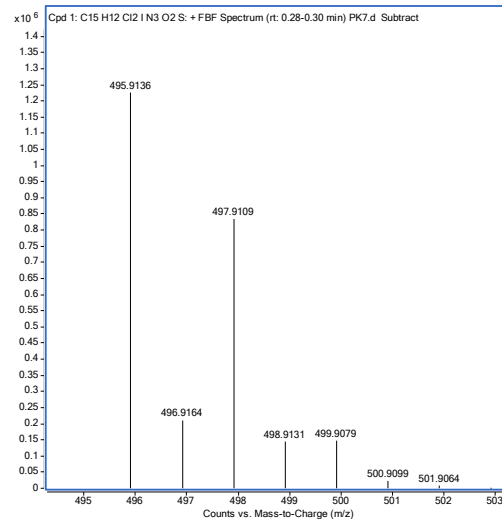

## PK8

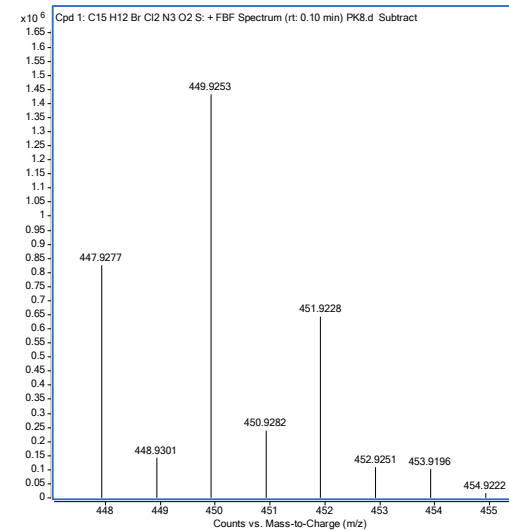

### PK10

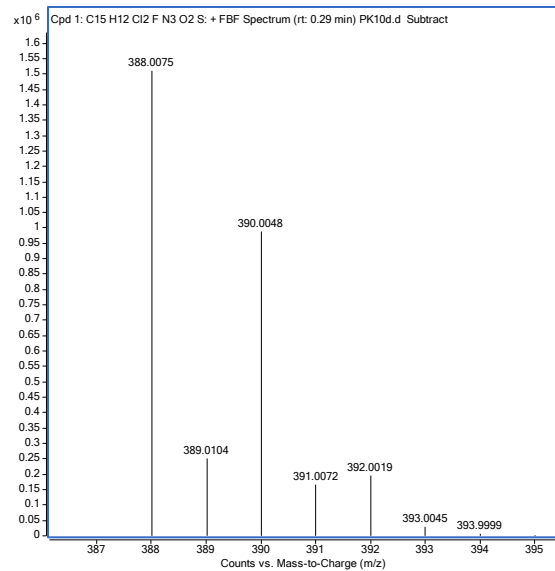

### PK11

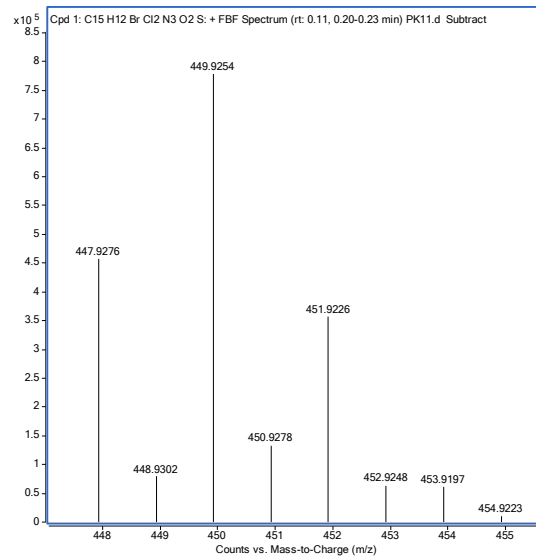

### PK12

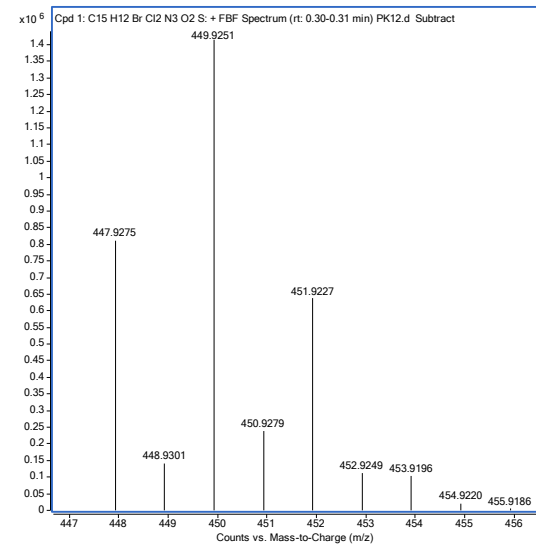

Supplement: s1 [file s1]
